# Supplementary material for: Mechanistic insights into benzyne formation via 1,2-di-iodobenzene photolysis
Source: Royal Society of Chemistry journal article supplement (doi:10.1039/d3nj04022d), 2023-01-01
Supplement: d3nj04022d1.pdf [file d3nj04022d1.pdf]

# Electronic Supplementary Information

## Mechanistic Insights into Benzyne Formation via 1,2-di-iodobenzene Photolysis

Cristian Guerra,<sup>\*acd</sup> Leandro Ayarde-Henríquez,<sup>\*b</sup> Yeray A. Rodríguez-Nuñez,<sup>a</sup> Eduardo Chamorro<sup>c</sup> and Adolfo E. Ensuncho<sup>d</sup>

<sup>a</sup>Universidad Andrés Bello. Departamento de Ciencias Químicas. Facultad de Ciencias Exactas. Avenida República 275, 8370146, Santiago de Chile, Chile.

<sup>b</sup>Trinity College Dublin, The University of Dublin. School of Physics, College Green Dublin 2, Ireland.

<sup>c</sup>Universidad Autónoma de Chile. Facultad de Ingeniería. Avenida Pedro de Valdivia 425, 7500912, Santiago de Chile, Chile.

<sup>d</sup>Universidad de Córdoba. Grupo de Química Computacional. Facultad de Ciencias Básicas. Carrera 6 No. 77-305, Montería-Córdoba, Colombia.

<sup>e</sup>Universidad Andrés Bello. Centro de Química Teórica y Computacional (CQT&C). Facultad de Ciencias Exactas. Santiago de Chile, Chile.

### This file includes:

|                                                                                                                                                                                                                                                                                                             |    |
|-------------------------------------------------------------------------------------------------------------------------------------------------------------------------------------------------------------------------------------------------------------------------------------------------------------|----|
| Overview of Bonding evolution theory (BET).....                                                                                                                                                                                                                                                             | 1  |
| Optimized Cartesian coordinates for reactants (Min1), transition structures (Min2 and Min3), products (P), and minimum energy conical intersection (MECI) points of functionalized 1,2-di-iodobenzenes at WB97X using the def2-TZVP basis set and including the CPCM solvation model (solvent=benzene)..... | 2  |
| Vibrational frequencies for relevant energy stationary points concerning the 1,2-di-iodobenzene derivatives photolysis.....                                                                                                                                                                                 | 17 |
| Table S1. Total energies calculated at the TD-DFT/def2-TZVP + CPCM(benzene) level for energy stationary points involved in the 1,2-dichoro-benzene photolysis.....                                                                                                                                          | 52 |
| Table S2. Total energies calculated at the TD-DFT/def2-TZVP + CPCM(benzene) level for energy stationary points involved in the 1,2-di-bromo-benzene photolysis.....                                                                                                                                         | 52 |
| Table S3. Total energies calculated at the TD-DFT/def2-TZVP + CPCM(benzene) level for energy stationary points involved in the 1,2-di-iodo-benzene photolysis.....                                                                                                                                          | 53 |
| Table S4. Total energies calculated at the WB97X/def2-TZVP + CPCM(benzene) level for energy stationary points involved in the 1,2,4 substituted di-iodo-benzenes photolysis.....                                                                                                                            | 53 |
| Figure S1. IRC of substituted 1,2,4-di-iodo benzenes along the FC → MECI-1 (S2/S1) deactivation process.....                                                                                                                                                                                                | 54 |
| Figure S2. IRC of benzyne and phenyl radicals productions from MECI-2. Benzyne forms at S0 for heaviest functionalized species, while the radical upon deactivation from T1.....                                                                                                                            | 54 |
| Figure S3. Relevant stationary energy points along the pathway of the 1,2-di-iodo-4-methyl benzene photolysis.....                                                                                                                                                                                          | 55 |

|                                                                                                                                                                |    |
|----------------------------------------------------------------------------------------------------------------------------------------------------------------|----|
| Table S5. Electronic populations, $e$ , of monosynaptic and disynaptic basins at stationary points featuring the 1,2-di-iodo-4-methyl benzene photolysis.....  | 55 |
| Figure S4. Relevant stationary energy points along the pathway of the 1,2-di-iodo-4-formylbenzene photolysis.....                                              | 56 |
| Table S6. Electronic populations, $e$ , of monosynaptic and disynaptic basins at stationary points featuring the 1,2-di-iodo-4-formylbenzene photolysis.....   | 56 |
| Figure S5. Relevant stationary energy points along the pathway of the 1,2-di-iodo-4-cyanobenzene photolysis.....                                               | 57 |
| Table S7. Electronic populations, $e$ , of monosynaptic and disynaptic basins at stationary points featuring the 1,2-di-iodo-4-cyanobenzene photolysis.....    | 57 |
| Figure S6. Relevant stationary energy points along the pathway of the 1,2-di-iodo-4-nitrobenzene photolysis.....                                               | 58 |
| Table S8. Electronic populations, $e$ , of monosynaptic and disynaptic basins at stationary points featuring the 1,2-di-iodo-4-nitrobenzene photolysis.....    | 58 |
| Figure S7. Relevant stationary energy points along the pathway of the 1,2-di-iodo-4-methoxybenzene photolysis.....                                             | 59 |
| Table S9. Electronic populations, $e$ , of monosynaptic and disynaptic basins at stationary points featuring the 1,2-di-iodo-4-methoxybenzene photolysis.....  | 59 |
| Figure S8. Relevant stationary energy points along the pathway of the 1,2-di-iodo-4-hydroxybenzene photolysis.....                                             | 60 |
| Table S10. Electronic populations, $e$ , of monosynaptic and disynaptic basins at stationary points featuring the 1,2-di-iodo-4-hydroxybenzene photolysis..... | 60 |
| References.....                                                                                                                                                | 60 |

## Overview of Bonding evolution theory (BET)

Silvi and co-workers introduced the Bonding evolution theory (BET)<sup>55</sup> as an alternative framework for approaching a very elusive concept: the chemical bond concept. Within this methodology, the modeling of a chemical reaction takes the form of a gradient dynamical system, wherein the electron localization function (ELF)<sup>56</sup> plays the role of a time-independent potential function. ELF serves as a quantum tool for visualizing the Pauli exclusion principle. The nullity condition of a potential, such as the ELF, defined over the 3D real space, yields four types of equilibria: attractors, saddles of index one and two, and repellers, each surrounded by its associated basin. The collection of these singular solutions is often referred to as the topographic map, molecular graph (MG), or phase-space portrait of the function or, more precisely, of its gradient.<sup>57-59</sup>

It is pertinent to mention that ELF maxima align closely with predictions stemming from the valence-shell electron pair repulsion theory (VSEPR),<sup>60</sup> establishing a robust connection between Lewis bonding concepts encompassing valence, bonds, core, and lone pairs.<sup>61-68</sup> The topographical analysis of ELF remains invariant

concerning the computational level;<sup>69,70</sup> moreover, this function can also be derived from X-ray diffraction data.<sup>71-72</sup>

Within the BET framework, the spatial arrangement of chemical bonding is conceptually elucidated through the interplay of electron localization pairs and electron density distributions, effectively delineated by basin populations. Particularly key molecular bonding events, including bond formation, cleavage, and the dynamic redistribution of electrons during chemical transformations, find adept representation through a succession of molecular configurations guided by the ELF (ELF-MG). This sequence is punctuated by sharp transitions in the spatial extent of electron pair localization, marking substantial shifts in the prevailing bonding interactions underlying the molecular system.

**Optimized Cartesian coordinates for reactants (Min1), transition structures (Min2 and Min3), products (P), and minimum energy conical intersection (MECI) points of functionalized 1,2-di-iodobenzenes at WB97X using the def2-TZVP basis set and including the CPCM solvation model (solvent=benzene).**

**Min1(S<sub>0</sub>)**

1,2-di-chloro benzene

|    |           |          |           |
|----|-----------|----------|-----------|
| C  | -5.224888 | 1.758818 | 0.043193  |
| C  | -3.837096 | 1.759340 | 0.028774  |
| C  | -3.146194 | 2.965973 | -0.013993 |
| C  | -3.848495 | 4.162630 | -0.043792 |
| C  | -5.232483 | 4.157625 | -0.030665 |
| C  | -5.921397 | 2.954365 | 0.013171  |
| H  | -5.748619 | 0.812131 | 0.077751  |
| H  | -3.296332 | 5.093039 | -0.077167 |
| H  | -5.771654 | 5.096457 | -0.054454 |
| H  | -7.004260 | 2.942980 | 0.024059  |
| Cl | -1.421792 | 3.008026 | -0.030907 |
| Cl | -3.000204 | 0.251350 | 0.063861  |

**Min1(S<sub>0</sub>)**

1,2-di-bromo benzene

|    |           |          |           |
|----|-----------|----------|-----------|
| C  | -5.241470 | 1.769478 | 0.042718  |
| C  | -3.852395 | 1.767999 | 0.028950  |
| C  | -3.161811 | 2.973953 | -0.014349 |
| C  | -3.865875 | 4.170827 | -0.043628 |
| C  | -5.249530 | 4.167226 | -0.030357 |
| C  | -5.938495 | 2.964463 | 0.012653  |
| H  | -5.770714 | 0.825886 | 0.076797  |
| H  | -3.318502 | 5.103926 | -0.076852 |
| H  | -5.787064 | 5.106965 | -0.053606 |
| H  | -7.021340 | 2.952082 | 0.023090  |
| Br | -1.279327 | 3.054435 | -0.036136 |
| Br | -2.966890 | 0.105495 | 0.070550  |

**Min1(S<sub>0</sub>)**

1,2-di-iodo benzene

|   |           |           |           |
|---|-----------|-----------|-----------|
| C | -5.261133 | 1.784151  | 0.042735  |
| C | -3.869117 | 1.776444  | 0.028605  |
| C | -3.177261 | 2.984269  | -0.014476 |
| C | -3.887492 | 4.181089  | -0.044211 |
| C | -5.271053 | 4.179863  | -0.030904 |
| C | -5.959788 | 2.977926  | 0.012969  |
| H | -5.799030 | 0.845343  | 0.076979  |
| H | -3.348660 | 5.119374  | -0.078063 |
| H | -5.807218 | 5.120478  | -0.054651 |
| H | -7.042668 | 2.963941  | 0.024108  |
| I | -1.095627 | 3.118181  | -0.037297 |
| I | -2.934366 | -0.088324 | 0.074037  |

**Min2(S<sub>1</sub>)**

1,2-di-chloro benzene

|    |           |          |           |
|----|-----------|----------|-----------|
| C  | -5.239695 | 1.779809 | 0.041958  |
| C  | -3.855829 | 1.872148 | 0.023968  |
| C  | -3.264501 | 3.087955 | -0.019847 |
| C  | -3.939977 | 4.274944 | -0.048116 |
| C  | -5.334546 | 4.196654 | -0.030034 |
| C  | -5.969786 | 2.961772 | 0.013870  |
| H  | -5.730481 | 0.814021 | 0.076832  |
| H  | -3.433148 | 5.232092 | -0.082799 |
| H  | -5.922843 | 5.106887 | -0.050117 |
| H  | -7.051697 | 2.915179 | 0.026737  |
| Cl | -0.852012 | 2.293355 | -0.009818 |
| Cl | -2.858898 | 0.427920 | 0.057198  |

**Min2(S<sub>1</sub>)**

1,2-di-bromo benzene

|    |           |           |           |
|----|-----------|-----------|-----------|
| C  | -5.362583 | 1.795125  | 0.051727  |
| C  | -3.989426 | 1.801805  | 0.043311  |
| C  | -3.271563 | 2.944615  | -0.002619 |
| C  | -3.887726 | 4.185293  | -0.043901 |
| C  | -5.276553 | 4.209667  | -0.036686 |
| C  | -6.009626 | 3.029363  | 0.011344  |
| H  | -5.931501 | 0.873012  | 0.088221  |
| H  | -3.309899 | 5.101879  | -0.081102 |
| H  | -5.790855 | 5.162297  | -0.069820 |
| H  | -7.093118 | 3.066352  | 0.016895  |
| Br | -1.348788 | 2.804159  | -0.011205 |
| Br | -2.181775 | -0.010833 | 0.033667  |

**Min2(S<sub>1</sub>)**

1,2-di-iodo benzene

|   |           |          |           |
|---|-----------|----------|-----------|
| C | -5.351396 | 1.801772 | 0.047894  |
| C | -3.971817 | 1.816498 | 0.035775  |
| C | -3.286217 | 2.971600 | -0.007922 |
| C | -3.907340 | 4.209170 | -0.044052 |
| C | -5.296148 | 4.218107 | -0.034224 |
| C | -6.013743 | 3.026103 | 0.012078  |
| H | -5.913248 | 0.873946 | 0.083545  |
| H | -3.340227 | 5.132938 | -0.079641 |

|   |           |           |           |
|---|-----------|-----------|-----------|
| H | -5.821685 | 5.164996  | -0.063600 |
| H | -7.097776 | 3.050377  | 0.019640  |
| I | -1.128862 | 2.829664  | -0.022709 |
| I | -2.324956 | -0.132435 | 0.053047  |

**Min3(T<sub>1</sub>)**

1,2-di-chloro benzene

|    |           |          |           |
|----|-----------|----------|-----------|
| C  | -5.376777 | 1.767792 | 0.044014  |
| C  | -3.986340 | 1.748808 | 0.026041  |
| C  | -3.334300 | 2.949891 | -0.017671 |
| C  | -3.941972 | 4.175265 | -0.047517 |
| C  | -5.336459 | 4.184932 | -0.029954 |
| C  | -6.039365 | 2.987807 | 0.015737  |
| H  | -5.926756 | 0.834959 | 0.079855  |
| H  | -3.372047 | 5.096322 | -0.082385 |
| H  | -5.868715 | 5.128546 | -0.051895 |
| H  | -7.122390 | 2.999760 | 0.029710  |
| Cl | -0.030431 | 2.838385 | -0.024630 |
| Cl | -3.117861 | 0.250268 | 0.058526  |

**Min3(T<sub>1</sub>)**

1,2-di-bromo benzene

|    |           |           |           |
|----|-----------|-----------|-----------|
| C  | -5.238727 | 1.836478  | 0.084814  |
| C  | -3.875662 | 1.965072  | 0.091818  |
| C  | -3.198602 | 3.147966  | 0.028283  |
| C  | -3.941550 | 4.321201  | -0.049530 |
| C  | -5.328128 | 4.242505  | -0.059609 |
| C  | -5.977710 | 3.016061  | 0.006553  |
| H  | -5.723032 | 0.868342  | 0.136574  |
| H  | -3.438639 | 5.279459  | -0.101473 |
| H  | -5.908020 | 5.155329  | -0.120020 |
| H  | -7.060546 | 2.973475  | -0.003027 |
| Br | -1.308995 | 3.191910  | 0.046793  |
| Br | -2.453804 | -1.035061 | -0.061344 |

**Min3(T<sub>1</sub>)**

1,2-di-iodo benzene

|   |           |           |           |
|---|-----------|-----------|-----------|
| C | -5.251316 | 1.866668  | 0.252025  |
| C | -3.888553 | 2.003387  | 0.294427  |
| C | -3.206283 | 3.171627  | 0.127999  |
| C | -3.949491 | 4.327695  | -0.102014 |
| C | -5.334515 | 4.243641  | -0.152728 |
| C | -5.986032 | 3.028534  | 0.022312  |
| H | -5.737593 | 0.907810  | 0.388536  |
| H | -3.450615 | 5.279837  | -0.240110 |
| H | -5.910914 | 5.142894  | -0.333192 |
| H | -7.067891 | 2.980904  | -0.020980 |
| I | -1.122430 | 3.218743  | 0.215964  |
| I | -2.547779 | -1.209003 | -0.452408 |

**P(S<sub>0</sub>)**

Benzynes + Cl<sub>2</sub>

|   |           |          |           |
|---|-----------|----------|-----------|
| C | -5.984938 | 1.886287 | 0.025068  |
| C | -4.620481 | 1.672781 | 0.029960  |
| C | -3.737862 | 2.536488 | 0.009874  |
| C | -3.887683 | 3.906206 | -0.017527 |

|    |           |          |           |
|----|-----------|----------|-----------|
| C  | -5.249738 | 4.232417 | -0.022850 |
| C  | -6.259773 | 3.258948 | -0.002620 |
| H  | -6.764004 | 1.136070 | 0.040666  |
| H  | -3.104546 | 4.652188 | -0.033582 |
| H  | -5.533940 | 5.278876 | -0.043515 |
| H  | -7.295108 | 3.582026 | -0.008765 |
| Cl | -0.342352 | 2.374263 | -0.131198 |
| Cl | -0.672975 | 0.446249 | 0.154388  |

**P(S<sub>0</sub>)**

Benzyne + Br<sub>2</sub>

|    |           |          |           |
|----|-----------|----------|-----------|
| C  | -5.898729 | 1.889644 | 0.081655  |
| C  | -4.523907 | 1.760734 | 0.120821  |
| C  | -3.697757 | 2.678149 | 0.080229  |
| C  | -3.929630 | 4.033008 | -0.011859 |
| C  | -5.308871 | 4.272775 | -0.058371 |
| C  | -6.257181 | 3.239895 | -0.012614 |
| H  | -6.629475 | 1.092769 | 0.116025  |
| H  | -3.194184 | 4.825400 | -0.046239 |
| H  | -5.656888 | 5.297330 | -0.132136 |
| H  | -7.309953 | 3.497828 | -0.051660 |
| Br | -0.194930 | 2.276186 | -0.043194 |
| Br | -0.851897 | 0.099084 | -0.042756 |

**P(S<sub>0</sub>)**

Benzyne + I<sub>2</sub>

|   |           |           |           |
|---|-----------|-----------|-----------|
| C | -5.613892 | 1.898683  | 0.046887  |
| C | -4.239630 | 2.020461  | 0.015074  |
| C | -3.581285 | 3.064882  | -0.035604 |
| C | -4.059777 | 4.358274  | -0.068400 |
| C | -5.459773 | 4.351200  | -0.039787 |
| C | -6.208474 | 3.166023  | 0.016077  |
| H | -6.190637 | 0.984829  | 0.091607  |
| H | -3.480038 | 5.270226  | -0.112748 |
| H | -5.985944 | 5.299277  | -0.062444 |
| H | -7.290807 | 3.233341  | 0.036902  |
| I | -0.006122 | 1.800532  | 0.161239  |
| I | -1.337021 | -0.484927 | -0.048902 |

**Min1(S<sub>0</sub>)**

1,2,4-di-iodo methyl benzene

|   |           |          |           |
|---|-----------|----------|-----------|
| C | -5.283564 | 1.877876 | 0.053764  |
| C | -3.890807 | 1.869499 | 0.035541  |
| C | -3.195349 | 3.071542 | -0.018462 |
| C | -3.913133 | 4.264702 | -0.053828 |
| C | -5.293968 | 4.258985 | -0.036680 |
| C | -6.003382 | 3.062284 | 0.016067  |
| H | -5.816653 | 0.935555 | 0.098315  |
| H | -3.379918 | 5.206112 | -0.094583 |
| H | -5.828445 | 5.202263 | -0.064007 |
| I | -1.114759 | 3.208420 | -0.047722 |
| I | -2.961023 | 0.002091 | 0.093170  |
| C | -7.505943 | 3.056041 | 0.018940  |
| H | -7.896645 | 3.728010 | 0.784841  |
| H | -7.892614 | 3.396191 | -0.944129 |

|   |           |          |          |
|---|-----------|----------|----------|
| H | -7.897295 | 2.056331 | 0.206273 |
|---|-----------|----------|----------|

**Min2(S<sub>1</sub>)**

1,2,4-di-iodo methyl benzene

|   |           |           |           |
|---|-----------|-----------|-----------|
| C | -5.266333 | 1.822465  | 0.083797  |
| C | -3.887066 | 1.820358  | 0.073126  |
| C | -3.184211 | 2.962058  | -0.010863 |
| C | -3.802415 | 4.199746  | -0.094166 |
| C | -5.188602 | 4.219668  | -0.086308 |
| C | -5.938541 | 3.043377  | 0.005566  |
| H | -5.834988 | 0.898810  | 0.148712  |
| H | -3.232000 | 5.119631  | -0.166813 |
| H | -5.702178 | 5.172557  | -0.156958 |
| I | -1.033374 | 2.804700  | -0.024181 |
| I | -2.251557 | -0.148587 | 0.125280  |
| C | -7.441593 | 3.099073  | 0.037099  |
| H | -7.876131 | 2.118257  | -0.156914 |
| H | -7.793769 | 3.433675  | 1.015654  |
| H | -7.825366 | 3.799375  | -0.706355 |

**Min3(T<sub>1</sub>)**

1,2,4-di-iodo methyl benzene

|   |           |           |           |
|---|-----------|-----------|-----------|
| C | -5.381592 | 1.853583  | 0.175183  |
| C | -4.013434 | 1.843275  | 0.186822  |
| C | -3.217039 | 2.936851  | 0.045533  |
| C | -3.838028 | 4.170507  | -0.124436 |
| C | -5.223448 | 4.229278  | -0.138634 |
| C | -6.014414 | 3.089874  | 0.011113  |
| H | -5.962289 | 0.944197  | 0.286036  |
| H | -3.249297 | 5.072318  | -0.247815 |
| H | -5.703548 | 5.191776  | -0.276042 |
| I | -1.136000 | 2.768857  | 0.076823  |
| I | -1.298207 | -0.573476 | -0.019414 |
| C | -7.514078 | 3.188989  | 0.020313  |
| H | -7.972141 | 2.269782  | -0.345054 |
| H | -7.878965 | 3.360954  | 1.035814  |
| H | -7.855648 | 4.018399  | -0.599567 |

**P(S<sub>0</sub>)**

4-methyl benzyne + I<sub>2</sub>

|   |           |          |           |
|---|-----------|----------|-----------|
| C | -6.512742 | 1.841054 | 0.063050  |
| C | -5.134558 | 1.753647 | 0.042637  |
| C | -4.331715 | 2.689218 | -0.012447 |
| C | -4.622097 | 4.037775 | -0.065727 |
| C | -6.004835 | 4.231689 | -0.048900 |
| C | -6.938983 | 3.176397 | 0.013538  |
| H | -7.216226 | 1.019268 | 0.109586  |
| H | -3.915934 | 4.856285 | -0.114197 |
| H | -6.382473 | 5.248898 | -0.086993 |
| I | -0.655268 | 2.901411 | -0.198556 |
| I | -1.028279 | 0.313654 | 0.253377  |
| C | -8.412731 | 3.491600 | 0.029268  |
| H | -8.676147 | 4.080836 | 0.909814  |
| H | -8.697977 | 4.070220 | -0.851204 |
| H | -9.009137 | 2.579448 | 0.042953  |

**Min1(S<sub>0</sub>)**

1,2,4-di-iodo formyl benzene

|   |           |           |           |
|---|-----------|-----------|-----------|
| C | -5.296907 | 1.862875  | 0.033297  |
| C | -3.906325 | 1.839557  | 0.016915  |
| C | -3.208585 | 3.044541  | -0.020923 |
| C | -3.908173 | 4.252493  | -0.044717 |
| C | -5.286320 | 4.265548  | -0.029542 |
| C | -5.985882 | 3.064524  | 0.010834  |
| H | -5.850315 | 0.930833  | 0.063643  |
| H | -3.357766 | 5.183823  | -0.074629 |
| H | -5.834106 | 5.199675  | -0.047444 |
| I | -1.129532 | 3.161524  | -0.043404 |
| I | -2.986512 | -0.030822 | 0.051870  |
| C | -7.467883 | 3.046296  | 0.032907  |
| O | -8.157312 | 4.034432  | 0.011527  |
| H | -7.920181 | 2.037002  | 0.071165  |

**Min2(S<sub>1</sub>)**

1,2,4-di-iodo formyl benzene

|   |           |           |           |
|---|-----------|-----------|-----------|
| C | -5.429665 | 1.882337  | 0.036489  |
| C | -4.051599 | 1.812277  | 0.028921  |
| C | -3.310225 | 2.935854  | -0.003726 |
| C | -3.865846 | 4.209292  | -0.031905 |
| C | -5.245627 | 4.298103  | -0.028333 |
| C | -6.028034 | 3.141887  | 0.006518  |
| H | -6.050027 | 0.989882  | 0.063267  |
| H | -3.247985 | 5.099885  | -0.056449 |
| H | -5.736638 | 5.263383  | -0.052263 |
| I | -1.170972 | 2.697811  | -0.015027 |
| I | -2.493000 | -0.216186 | 0.048470  |
| C | -7.507060 | 3.238196  | 0.010726  |
| O | -8.124248 | 4.273286  | -0.034743 |
| H | -8.034988 | 2.266336  | 0.059620  |

**Min3(T<sub>1</sub>)**

1,2,4-di-iodo formyl benzene

|   |           |           |           |
|---|-----------|-----------|-----------|
| C | -5.533815 | 1.910543  | 0.034228  |
| C | -4.166542 | 1.846737  | 0.027162  |
| C | -3.338068 | 2.926058  | -0.004693 |
| C | -3.904392 | 4.201206  | -0.035000 |
| C | -5.282418 | 4.317945  | -0.031357 |
| C | -6.097653 | 3.187256  | 0.004101  |
| H | -6.157887 | 1.023119  | 0.060877  |
| H | -3.275007 | 5.082714  | -0.060429 |
| H | -5.748384 | 5.295335  | -0.055922 |
| I | -1.265612 | 2.678770  | -0.008335 |
| I | -1.662573 | -0.660134 | 0.058685  |
| C | -7.575504 | 3.327034  | 0.011835  |
| O | -8.154066 | 4.383471  | -0.015759 |
| H | -8.133994 | 2.372287  | 0.046170  |

**P(S<sub>0</sub>)**4-formyl benzyne + I<sub>2</sub>

|   |           |          |          |
|---|-----------|----------|----------|
| C | -6.551121 | 1.857663 | 0.076787 |
| C | -5.176409 | 1.749758 | 0.069684 |



|   |           |          |           |
|---|-----------|----------|-----------|
| C | -4.379202 | 2.690993 | 0.020737  |
| C | -4.635825 | 4.045582 | -0.039530 |
| C | -6.013788 | 4.260405 | -0.039317 |
| C | -6.944823 | 3.204873 | 0.016631  |
| H | -7.271931 | 1.049776 | 0.120002  |
| H | -3.913018 | 4.848576 | -0.081028 |
| H | -6.397829 | 5.273143 | -0.083394 |
| I | -0.669731 | 2.920321 | -0.008312 |
| I | -1.104438 | 0.302495 | -0.015129 |
| C | -8.398121 | 3.501543 | 0.011598  |
| O | -8.874286 | 4.608400 | -0.036502 |
| H | -9.050477 | 2.608271 | 0.055873  |

**Min1(S<sub>0</sub>)**

1,2,4-di-iodo cyano benzene

|   |           |          |           |
|---|-----------|----------|-----------|
| C | -5.320104 | 2.433516 | 0.993859  |
| C | -3.958480 | 2.176395 | 0.898730  |
| C | -3.233081 | 2.705442 | -0.168704 |
| C | -3.881534 | 3.480300 | -1.127219 |
| C | -5.235314 | 3.733100 | -1.036565 |
| C | -5.955647 | 3.207211 | 0.031136  |
| H | -5.893241 | 2.031663 | 1.819212  |
| H | -3.316860 | 3.889239 | -1.954840 |
| H | -5.730916 | 4.333873 | -1.788101 |
| I | -1.190197 | 2.401544 | -0.427914 |
| I | -3.115243 | 0.999154 | 2.395992  |
| C | -7.366835 | 3.459272 | 0.146224  |
| N | -8.493249 | 3.661391 | 0.236790  |

**Min2(S<sub>1</sub>)**

1,2,4-di-iodo cyano benzene

|   |           |           |           |
|---|-----------|-----------|-----------|
| C | -5.416994 | 1.856106  | 0.050009  |
| C | -4.041077 | 1.808481  | 0.034042  |
| C | -3.308441 | 2.939608  | -0.014230 |
| C | -3.876892 | 4.203192  | -0.050113 |
| C | -5.259449 | 4.281945  | -0.037162 |
| C | -6.024977 | 3.114781  | 0.013078  |
| H | -6.028670 | 0.960947  | 0.088793  |
| H | -3.272252 | 5.102142  | -0.087904 |
| H | -5.749856 | 5.246512  | -0.066603 |
| I | -1.169579 | 2.717497  | -0.040032 |
| I | -2.474644 | -0.203884 | 0.062993  |
| C | -7.460885 | 3.208619  | 0.026439  |
| N | -8.607215 | 3.276045  | 0.039327  |

**Min3(T<sub>1</sub>)**

1,2,4-di-iodo cyano benzene

|   |           |          |           |
|---|-----------|----------|-----------|
| C | -5.516758 | 1.893439 | 0.047290  |
| C | -4.151415 | 1.852389 | 0.030270  |
| C | -3.331625 | 2.939098 | -0.016542 |
| C | -3.912495 | 4.203926 | -0.050971 |
| C | -5.293582 | 4.310652 | -0.037235 |
| C | -6.092601 | 3.168005 | 0.011755  |
| H | -6.130082 | 1.001596 | 0.085254  |
| H | -3.296577 | 5.094311 | -0.087842 |

|   |           |           |           |
|---|-----------|-----------|-----------|
| H | -5.758256 | 5.287693  | -0.065227 |
| I | -1.258494 | 2.704329  | -0.037228 |
| I | -1.754413 | -0.632729 | 0.072424  |
| C | -7.525382 | 3.296498  | 0.026737  |
| N | -8.669252 | 3.392782  | 0.039950  |

**P(S<sub>0</sub>)**

4-cyano benzyne + I<sub>2</sub>

|   |           |           |           |
|---|-----------|-----------|-----------|
| C | -6.376195 | 1.904368  | -0.286643 |
| C | -5.001706 | 1.871202  | -0.197362 |
| C | -4.288168 | 2.850376  | 0.045756  |
| C | -4.620437 | 4.162150  | 0.283583  |
| C | -6.008423 | 4.301679  | 0.213883  |
| C | -6.855113 | 3.209187  | -0.061677 |
| H | -7.043241 | 1.078777  | -0.496453 |
| H | -3.956374 | 4.988433  | 0.494673  |
| H | -6.452884 | 5.276747  | 0.375685  |
| I | -0.756084 | 2.547473  | 0.168696  |
| I | -1.275125 | -0.031813 | -0.165251 |
| C | -8.275001 | 3.441902  | -0.115156 |
| N | -9.407849 | 3.624719  | -0.158034 |

**Min1(S<sub>0</sub>)**

1,2,4-di-iodo nitro benzene

|   |           |           |           |
|---|-----------|-----------|-----------|
| C | -5.282368 | 1.841827  | 0.033359  |
| C | -3.893523 | 1.838550  | 0.017148  |
| C | -3.204574 | 3.051418  | -0.020638 |
| C | -3.913070 | 4.250703  | -0.041669 |
| C | -5.293826 | 4.259170  | -0.024704 |
| C | -5.953199 | 3.046383  | 0.012434  |
| H | -5.843669 | 0.918816  | 0.062038  |
| H | -3.375137 | 5.188909  | -0.071649 |
| H | -5.850179 | 5.185315  | -0.040126 |
| I | -1.127952 | 3.183620  | -0.048083 |
| I | -2.958266 | -0.022136 | 0.051621  |
| N | -7.426185 | 3.032140  | 0.030007  |
| O | -7.996639 | 4.099675  | 0.026459  |
| O | -7.980612 | 1.956510  | 0.046501  |

**Min2(S<sub>1</sub>)**

1,2,4-di-iodo nitro benzene

|   |           |           |           |
|---|-----------|-----------|-----------|
| C | -5.416598 | 1.861525  | 0.049284  |
| C | -4.039651 | 1.810814  | 0.035251  |
| C | -3.303280 | 2.941071  | -0.012808 |
| C | -3.867692 | 4.207244  | -0.051623 |
| C | -5.249954 | 4.292237  | -0.041611 |
| C | -5.994418 | 3.122654  | 0.009880  |
| H | -6.041667 | 0.977842  | 0.087602  |
| H | -3.260193 | 5.104165  | -0.089102 |
| H | -5.750315 | 5.249517  | -0.072950 |
| I | -1.169495 | 2.712624  | -0.032330 |
| I | -2.479740 | -0.210129 | 0.070184  |
| N | -7.466187 | 3.227338  | 0.023452  |
| O | -7.956034 | 4.333257  | -0.036196 |
| O | -8.104039 | 2.200754  | 0.093582  |

**Min3(T<sub>1</sub>)**

1,2,4-di-iodo nitro benzene

|   |           |           |           |
|---|-----------|-----------|-----------|
| C | -5.506548 | 1.892123  | 0.048496  |
| C | -4.140526 | 1.852762  | 0.032235  |
| C | -3.321293 | 2.940632  | -0.017907 |
| C | -3.900943 | 4.206137  | -0.056414 |
| C | -5.282350 | 4.314859  | -0.042890 |
| C | -6.055806 | 3.166606  | 0.009136  |
| H | -6.132077 | 1.010429  | 0.088482  |
| H | -3.284937 | 5.096191  | -0.096244 |
| H | -5.760979 | 5.283200  | -0.073229 |
| I | -1.249397 | 2.703684  | -0.038009 |
| I | -1.769723 | -0.633547 | 0.098827  |
| N | -7.525047 | 3.299252  | 0.023111  |
| O | -7.989843 | 4.416478  | 0.008004  |
| O | -8.179793 | 2.282107  | 0.049019  |

**P(S<sub>0</sub>)**4-nitro benzyne + I<sub>2</sub>

|   |           |           |           |
|---|-----------|-----------|-----------|
| C | -6.394127 | 1.931388  | 0.061269  |
| C | -5.018228 | 1.985929  | 0.051576  |
| C | -4.339099 | 3.016491  | 0.005952  |
| C | -4.738910 | 4.333160  | -0.042524 |
| C | -6.132759 | 4.396786  | -0.037790 |
| C | -6.910158 | 3.230689  | 0.013078  |
| H | -7.031469 | 1.060331  | 0.099788  |
| H | -4.112906 | 5.213228  | -0.080473 |
| H | -6.634986 | 5.353803  | -0.074267 |
| I | -0.798824 | 2.339904  | -0.040039 |
| I | -1.719482 | -0.146424 | 0.060962  |
| N | -8.378152 | 3.379739  | 0.017288  |
| O | -8.839148 | 4.499141  | -0.006997 |
| O | -9.044553 | 2.368938  | 0.045176  |

**Min1(S<sub>0</sub>)**

1,2,4-di-iodo methoxy benzene

|   |           |          |           |
|---|-----------|----------|-----------|
| C | -5.269772 | 1.821754 | 0.022632  |
| C | -3.875850 | 1.853838 | -0.023137 |
| C | -3.199564 | 3.064403 | -0.046524 |
| C | -3.942038 | 4.246881 | -0.021650 |
| C | -5.316399 | 4.225650 | 0.023771  |
| C | -5.991943 | 3.006371 | 0.044406  |
| H | -5.773318 | 0.866161 | 0.041025  |
| H | -3.427528 | 5.199238 | -0.039294 |
| H | -5.888200 | 5.144799 | 0.042988  |
| I | -1.124063 | 3.241850 | -0.117229 |
| I | -2.913461 | 0.001773 | -0.053011 |
| O | -7.339698 | 3.073308 | 0.085262  |
| C | -8.069453 | 1.859090 | 0.092056  |
| H | -9.119704 | 2.138606 | 0.114106  |
| H | -7.866296 | 1.273384 | -0.808660 |
| H | -7.832311 | 1.262392 | 0.977259  |

**Min2(S<sub>1</sub>)**

1,2,4-di-iodo methoxy benzene

|   |           |          |           |
|---|-----------|----------|-----------|
| C | -5.344124 | 1.831322 | 0.064244  |
| C | -3.956591 | 1.883375 | 0.041465  |
| C | -3.258242 | 3.021402 | -0.015414 |
| C | -3.906209 | 4.244625 | -0.055021 |
| C | -5.290017 | 4.253443 | -0.034478 |
| C | -6.010155 | 3.052716 | 0.024272  |
| H | -5.872410 | 0.888094 | 0.111101  |
| H | -3.359552 | 5.181002 | -0.102210 |
| H | -5.846491 | 5.183172 | -0.064402 |
| I | -0.780165 | 2.477994 | -0.041198 |
| I | -2.821259 | 0.035358 | 0.091742  |
| O | -7.359651 | 3.174279 | 0.038286  |
| C | -8.126587 | 1.985544 | 0.064270  |
| H | -9.168892 | 2.294612 | 0.062677  |
| H | -7.927494 | 1.370157 | -0.818011 |
| H | -7.921675 | 1.402503 | 0.966893  |

**Min3(T<sub>1</sub>)**

1,2,4-di-iodo methoxy benzene

|   |           |          |           |
|---|-----------|----------|-----------|
| C | -5.361249 | 1.882068 | 0.081763  |
| C | -3.967237 | 1.933304 | 0.045970  |
| C | -3.345673 | 3.135813 | -0.020235 |
| C | -4.005204 | 4.341716 | -0.058055 |
| C | -5.388834 | 4.305381 | -0.028489 |
| C | -6.064845 | 3.082080 | 0.037646  |
| H | -5.868489 | 0.928498 | 0.137204  |
| H | -3.474901 | 5.284779 | -0.111156 |
| H | -5.973666 | 5.216726 | -0.058482 |
| I | 0.004839  | 1.918776 | -0.069251 |
| I | -2.849288 | 0.168378 | 0.103859  |
| O | -7.415729 | 3.162220 | 0.053956  |
| C | -8.155033 | 1.955024 | 0.055287  |
| H | -9.203503 | 2.242053 | 0.041284  |
| H | -7.929300 | 1.355866 | -0.831658 |
| H | -7.951399 | 1.366915 | 0.954572  |

**P(S<sub>0</sub>)**

4-methoxy benzyne + I<sub>2</sub>

|   |            |           |           |
|---|------------|-----------|-----------|
| C | -6.255597  | 1.864709  | 0.072297  |
| C | -4.882097  | 2.012907  | 0.044074  |
| C | -4.232926  | 3.058969  | -0.003815 |
| C | -4.734758  | 4.349622  | -0.047159 |
| C | -6.121985  | 4.330547  | -0.026354 |
| C | -6.868690  | 3.127226  | 0.031463  |
| H | -6.807429  | 0.937585  | 0.116374  |
| H | -4.166166  | 5.268767  | -0.090246 |
| H | -6.680421  | 5.258784  | -0.054273 |
| I | -0.620068  | 2.398243  | -0.157103 |
| I | -1.484231  | -0.098590 | 0.078441  |
| O | -8.214038  | 3.299060  | 0.043895  |
| C | -9.027695  | 2.141636  | 0.084939  |
| H | -10.056153 | 2.493705  | 0.082856  |
| H | -8.856235  | 1.509534  | -0.791111 |
| H | -8.842812  | 1.562093  | 0.993921  |

**Min1(S<sub>0</sub>)**

1,2,4-di-iodo hydroxy benzene

|   |           |           |           |
|---|-----------|-----------|-----------|
| C | -5.253255 | 1.819077  | 0.050923  |
| C | -3.865711 | 1.834225  | 0.041158  |
| C | -3.178040 | 3.045543  | -0.011793 |
| C | -3.908362 | 4.227988  | -0.056090 |
| C | -5.290301 | 4.219670  | -0.047434 |
| C | -5.966371 | 3.008353  | 0.006964  |
| H | -5.799225 | 0.885566  | 0.092225  |
| H | -3.386720 | 5.175708  | -0.097997 |
| H | -5.840669 | 5.153337  | -0.082388 |
| I | -1.099314 | 3.203160  | -0.027576 |
| I | -2.913929 | -0.020969 | 0.108077  |
| O | -7.318459 | 2.922706  | 0.018932  |
| H | -7.706344 | 3.802136  | -0.017301 |

**Min2(S<sub>1</sub>)**

1,2,4-di-iodo hydroxy benzene

|   |           |           |           |
|---|-----------|-----------|-----------|
| C | -5.402043 | 1.860530  | 0.051387  |
| C | -4.027633 | 1.824096  | 0.032020  |
| C | -3.283481 | 2.948178  | -0.018416 |
| C | -3.865674 | 4.203956  | -0.054580 |
| C | -5.249992 | 4.277843  | -0.038215 |
| C | -6.016345 | 3.112845  | 0.015328  |
| H | -6.017895 | 0.967889  | 0.091935  |
| H | -3.268863 | 5.109059  | -0.095089 |
| H | -5.740740 | 5.244764  | -0.067738 |
| I | -1.148454 | 2.726605  | -0.045807 |
| I | -2.449577 | -0.199384 | 0.065851  |
| O | -7.373475 | 3.144972  | 0.034047  |
| H | -7.682611 | 4.055248  | 0.006948  |

**Min3(T<sub>1</sub>)**

1,2,4-di-iodo hydroxy benzene

|   |           |           |           |
|---|-----------|-----------|-----------|
| C | -5.520307 | 1.905082  | 0.049206  |
| C | -4.156253 | 1.860096  | 0.029449  |
| C | -3.319077 | 2.933714  | -0.019638 |
| C | -3.901402 | 4.196522  | -0.054704 |
| C | -5.282476 | 4.312670  | -0.039077 |
| C | -6.092757 | 3.178745  | 0.013357  |
| H | -6.147120 | 1.022411  | 0.089284  |
| H | -3.284979 | 5.087340  | -0.093955 |
| H | -5.737739 | 5.296415  | -0.068385 |
| I | -1.246405 | 2.688454  | -0.041777 |
| I | -1.666894 | -0.629877 | 0.074759  |
| O | -7.444045 | 3.252966  | 0.031658  |
| H | -7.727329 | 4.172061  | 0.007490  |

**P(S<sub>0</sub>)**4-hydroxy benzyne + I<sub>2</sub>

|   |           |          |           |
|---|-----------|----------|-----------|
| C | -6.476646 | 1.879410 | 0.058598  |
| C | -5.099962 | 1.838592 | 0.050173  |
| C | -4.322121 | 2.796622 | 0.008478  |
| C | -4.643072 | 4.137043 | -0.038784 |
| C | -6.027910 | 4.304085 | -0.034442 |

|   |           |          |           |
|---|-----------|----------|-----------|
| C | -6.918911 | 3.209944 | 0.012825  |
| H | -7.175656 | 1.054604 | 0.093976  |
| H | -3.956122 | 4.972360 | -0.074704 |
| H | -6.441810 | 5.307008 | -0.069361 |
| I | -0.711844 | 2.784489 | -0.054729 |
| I | -1.191953 | 0.178873 | 0.055573  |
| O | -8.266853 | 3.400515 | 0.015954  |
| H | -8.470441 | 4.339255 | -0.012657 |

**MECI-1 (S<sub>2</sub>/S<sub>1</sub>)**

1,2-di-iodo benzene

|   |           |           |           |
|---|-----------|-----------|-----------|
| C | -5.258854 | 1.829036  | 0.039833  |
| C | -3.886785 | 1.897517  | 0.024933  |
| C | -3.201488 | 3.053304  | -0.018941 |
| C | -3.878278 | 4.252593  | -0.049135 |
| C | -5.262349 | 4.219279  | -0.030856 |
| C | -5.958132 | 3.014800  | 0.011691  |
| H | -5.758638 | 0.868233  | 0.069118  |
| H | -3.345081 | 5.189065  | -0.086107 |
| H | -5.798590 | 5.153856  | -0.052298 |
| H | -7.036478 | 2.999916  | 0.024090  |
| I | -1.040619 | 3.082465  | -0.037363 |
| I | -2.817416 | -0.232536 | 0.078609  |

**MECI-1 (S<sub>2</sub>/S<sub>1</sub>)**

1,2,4-di-iodo methyl benzene

|   |           |          |           |
|---|-----------|----------|-----------|
| C | -5.316885 | 1.869897 | 0.004612  |
| C | -3.927001 | 1.882735 | -0.006913 |
| C | -3.272084 | 3.069702 | -0.011843 |
| C | -3.930762 | 4.290090 | -0.010801 |
| C | -5.314818 | 4.288669 | -0.000640 |
| C | -6.018100 | 3.075254 | 0.010323  |
| H | -5.866933 | 0.935515 | 0.013397  |
| H | -3.382406 | 5.232569 | -0.013910 |
| H | -5.837744 | 5.240693 | 0.003962  |
| I | -0.856604 | 3.118294 | -0.028085 |
| I | -2.871492 | 0.010898 | -0.008363 |
| C | -7.524290 | 3.052757 | 0.022058  |
| H | -7.926412 | 3.794351 | 0.714406  |
| H | -7.929185 | 3.277506 | -0.967941 |
| H | -7.905599 | 2.072908 | 0.314205  |

**MECI-1 (S<sub>2</sub>/S<sub>1</sub>)**

1,2,4-di-iodo formyl benzene

|   |           |          |           |
|---|-----------|----------|-----------|
| C | -5.356833 | 1.825084 | 0.036530  |
| C | -3.815777 | 1.823657 | 0.017688  |
| C | -3.130760 | 3.003932 | -0.021140 |
| C | -3.913679 | 4.334176 | -0.046010 |
| C | -5.267811 | 4.331836 | -0.029332 |
| C | -6.035584 | 2.995851 | 0.014610  |
| H | -5.887814 | 0.897354 | 0.066999  |
| H | -3.380005 | 5.260232 | -0.076504 |
| H | -5.805335 | 5.256928 | -0.046614 |
| I | -1.041019 | 3.005720 | -0.047013 |
| I | -2.762580 | 0.011081 | 0.051501  |

|   |           |          |          |
|---|-----------|----------|----------|
| C | -7.576073 | 2.994161 | 0.033594 |
| O | -8.206821 | 4.082453 | 0.013188 |
| H | -8.108385 | 2.066999 | 0.064083 |

**MECI-1 (S<sub>2</sub>/S<sub>1</sub>)**

1,2,4-di-iodo cyano benzene

|   |           |          |           |
|---|-----------|----------|-----------|
| C | -5.324103 | 2.462978 | 0.941796  |
| C | -3.969830 | 2.227896 | 0.821340  |
| C | -3.244056 | 2.742642 | -0.224535 |
| C | -3.872767 | 3.519743 | -1.191968 |
| C | -5.231583 | 3.769027 | -1.090068 |
| C | -5.962381 | 3.242550 | -0.023800 |
| H | -5.898484 | 2.054742 | 1.768281  |
| H | -3.309135 | 3.929339 | -2.021297 |
| H | -5.721723 | 4.373706 | -1.842423 |
| I | -1.180672 | 2.394634 | -0.425386 |
| I | -2.910272 | 0.782889 | 2.664582  |
| C | -7.374202 | 3.491061 | 0.098552  |
| N | -8.502104 | 3.668756 | 0.228294  |

**MECI-1 (S<sub>2</sub>/S<sub>1</sub>)**

1,2,4-di-iodo nitro benzene

|   |           |           |           |
|---|-----------|-----------|-----------|
| C | -5.293150 | 1.865386  | 0.081244  |
| C | -3.914913 | 1.906410  | 0.052927  |
| C | -3.236392 | 3.096149  | -0.048634 |
| C | -3.934003 | 4.296990  | -0.132816 |
| C | -5.318258 | 4.284150  | -0.083305 |
| C | -5.975619 | 3.069612  | 0.022596  |
| H | -5.843381 | 0.933925  | 0.145600  |
| H | -3.405039 | 5.235491  | -0.242232 |
| H | -5.879962 | 5.206604  | -0.127613 |
| I | -1.136448 | 3.165267  | -0.075227 |
| I | -2.728924 | -0.387546 | 0.048861  |
| N | -7.449816 | 3.052895  | 0.049172  |
| O | -8.029682 | 4.115323  | 0.021648  |
| O | -7.999469 | 1.974628  | 0.092903  |

**MECI-1 (S<sub>2</sub>/S<sub>1</sub>)**

1,2,4- di-iodo methoxy benzene

|   |           |           |           |
|---|-----------|-----------|-----------|
| C | -5.347520 | 1.854440  | -0.228024 |
| C | -3.973981 | 1.881156  | -0.125770 |
| C | -3.309226 | 3.053115  | 0.016798  |
| C | -3.976540 | 4.277876  | 0.052936  |
| C | -5.348206 | 4.291152  | -0.059663 |
| C | -6.049451 | 3.063594  | -0.188552 |
| H | -5.899719 | 0.931967  | -0.328002 |
| H | -3.426180 | 5.212285  | 0.179393  |
| H | -5.859107 | 5.245536  | -0.015480 |
| I | -0.992919 | 3.023899  | 0.198688  |
| I | -2.855603 | -0.031294 | -0.186825 |
| O | -7.401307 | 3.058628  | -0.232867 |
| C | -8.002463 | 1.825006  | 0.195208  |
| H | -9.076013 | 1.955620  | 0.322512  |
| H | -7.825458 | 1.026970  | -0.527985 |
| H | -7.555089 | 1.549762  | 1.152034  |

**MECI-1 (S<sub>2</sub>/S<sub>1</sub>)**

1,2,4-di-iodo hydroxy benzene

|   |           |           |           |
|---|-----------|-----------|-----------|
| C | -5.317039 | 1.766893  | 0.097556  |
| C | -3.933806 | 1.812737  | 0.047797  |
| C | -3.276659 | 3.009971  | -0.017973 |
| C | -3.958241 | 4.220300  | -0.034508 |
| C | -5.334515 | 4.209745  | 0.012469  |
| C | -6.017299 | 2.982071  | 0.069126  |
| H | -5.872464 | 0.834015  | 0.136155  |
| H | -3.421571 | 5.169165  | -0.081701 |
| H | -5.865818 | 5.154353  | 0.008530  |
| I | -0.879023 | 3.054488  | -0.106246 |
| I | -2.779749 | -0.005984 | 0.060162  |
| O | -7.370806 | 2.912029  | 0.111577  |
| H | -7.784763 | 3.664761  | -0.325953 |

**MECI-2(S<sub>0</sub>/S<sub>1</sub>)**

1,2-di-chloro benzene

|    |           |          |           |
|----|-----------|----------|-----------|
| C  | -5.502419 | 1.765481 | 0.043999  |
| C  | -4.133222 | 1.718933 | 0.031556  |
| C  | -3.338687 | 2.771703 | -0.006144 |
| C  | -3.857297 | 4.043302 | -0.037042 |
| C  | -5.237573 | 4.175587 | -0.027721 |
| C  | -6.055839 | 3.049488 | 0.012912  |
| H  | -6.132954 | 0.885902 | 0.075255  |
| H  | -3.170189 | 4.888509 | -0.067813 |
| H  | -5.677972 | 5.164648 | -0.052924 |
| H  | -7.134131 | 3.163955 | 0.020656  |
| Cl | -1.374041 | 2.822017 | -0.028126 |
| Cl | -1.839090 | 0.513210 | 0.035223  |

**MECI-2(S<sub>0</sub>/S<sub>1</sub>)**

1,2-di-bromo benzene

|    |           |          |           |
|----|-----------|----------|-----------|
| C  | -5.222965 | 1.820970 | 0.022767  |
| C  | -3.870099 | 2.064801 | -0.044476 |
| C  | -3.294286 | 3.216449 | -0.104028 |
| C  | -4.014592 | 4.396243 | -0.084065 |
| C  | -5.398974 | 4.244007 | -0.013140 |
| C  | -5.992430 | 2.979106 | 0.037416  |
| H  | -5.651548 | 0.825161 | 0.067758  |
| H  | -3.563226 | 5.380204 | -0.128739 |
| H  | -6.029958 | 5.126058 | -0.000321 |
| H  | -7.071203 | 2.896987 | 0.093439  |
| Br | -0.695815 | 1.774772 | 0.209067  |
| Br | -2.648318 | 0.237979 | -0.055844 |

**MECI-2(S<sub>0</sub>/S<sub>1</sub>)**

1,2-di-iodo benzene

|   |           |          |           |
|---|-----------|----------|-----------|
| C | -5.531826 | 1.815724 | 0.084046  |
| C | -4.155788 | 1.789900 | 0.050328  |
| C | -3.370220 | 2.819143 | -0.020192 |
| C | -3.874011 | 4.106385 | -0.071474 |
| C | -5.255040 | 4.229881 | -0.044712 |
| C | -6.074106 | 3.101573 | 0.033264  |
| H | -6.166779 | 0.941309 | 0.144764  |



|   |           |           |           |
|---|-----------|-----------|-----------|
| H | -3.211412 | 4.968130  | -0.130819 |
| H | -5.700462 | 5.216914  | -0.085737 |
| H | -7.151525 | 3.224167  | 0.055039  |
| I | -1.003114 | 2.756273  | -0.076179 |
| I | -1.959130 | -0.006665 | 0.061503  |

**MECI-2(S<sub>0</sub>/S<sub>1</sub>)**

1,2,4-di-iodo methyl benzene

|   |           |           |           |
|---|-----------|-----------|-----------|
| C | -5.325409 | 1.806224  | 0.079676  |
| C | -3.950925 | 1.874325  | 0.066071  |
| C | -3.253178 | 2.950056  | -0.009586 |
| C | -3.809744 | 4.211551  | -0.086698 |
| C | -5.201033 | 4.222656  | -0.077684 |
| C | -5.966729 | 3.046312  | 0.005243  |
| H | -5.895233 | 0.885630  | 0.139780  |
| H | -3.229930 | 5.126001  | -0.153271 |
| H | -5.718450 | 5.174581  | -0.140737 |
| I | -0.780997 | 2.541641  | -0.026314 |
| I | -2.074628 | -0.021303 | 0.142620  |
| C | -7.470335 | 3.120827  | 0.029111  |
| H | -7.912941 | 2.136546  | -0.125291 |
| H | -7.823697 | 3.499984  | 0.990482  |
| H | -7.844898 | 3.790134  | -0.746727 |

**MECI-2(S<sub>0</sub>/S<sub>1</sub>)**

1,2,4-di-iodo formyl benzene

|   |           |           |           |
|---|-----------|-----------|-----------|
| C | -5.524174 | 1.850540  | 0.038899  |
| C | -4.148230 | 1.817509  | 0.030593  |
| C | -3.389269 | 2.866457  | -0.000660 |
| C | -3.873754 | 4.161825  | -0.030762 |
| C | -5.254357 | 4.274982  | -0.028396 |
| C | -6.072867 | 3.136994  | 0.007083  |
| H | -6.163643 | 0.974463  | 0.066697  |
| H | -3.221291 | 5.029768  | -0.056067 |
| H | -5.726426 | 5.249939  | -0.053989 |
| I | -0.985467 | 2.610768  | -0.013624 |
| I | -2.145712 | -0.026914 | 0.038734  |
| C | -7.549224 | 3.281570  | 0.010271  |
| O | -8.131941 | 4.336192  | -0.035300 |
| H | -8.109558 | 2.328252  | 0.058085  |

**MECI-2(S<sub>0</sub>/S<sub>1</sub>)**

1,2,4-di-iodo cyano benzene

|   |           |           |           |
|---|-----------|-----------|-----------|
| C | -5.517543 | 1.826709  | 0.049784  |
| C | -4.144309 | 1.808971  | 0.032911  |
| C | -3.391449 | 2.865686  | -0.011488 |
| C | -3.885781 | 4.153526  | -0.049658 |
| C | -5.268410 | 4.262066  | -0.038444 |
| C | -6.072335 | 3.114017  | 0.012319  |
| H | -6.152500 | 0.950362  | 0.088822  |
| H | -3.241869 | 5.027481  | -0.087266 |
| H | -5.738454 | 5.237241  | -0.069190 |
| I | -0.992820 | 2.636905  | -0.032520 |
| I | -2.134060 | -0.005815 | 0.051893  |
| C | -7.504382 | 3.260935  | 0.028022  |

|   |           |          |          |
|---|-----------|----------|----------|
| N | -8.647019 | 3.373909 | 0.043451 |
|---|-----------|----------|----------|

**MECI-2(S<sub>0</sub>/S<sub>1</sub>)**

1,2,4-di-iodo nitro benzene

|   |           |          |           |
|---|-----------|----------|-----------|
| C | -5.536218 | 1.819134 | 0.049826  |
| C | -4.161220 | 1.776343 | 0.035062  |
| C | -3.385057 | 2.822363 | -0.010286 |
| C | -3.874749 | 4.113527 | -0.052568 |
| C | -5.251059 | 4.253950 | -0.043774 |
| C | -6.048510 | 3.113882 | 0.009014  |
| H | -6.196480 | 0.963761 | 0.089340  |
| H | -3.208744 | 4.972650 | -0.090923 |
| H | -5.712522 | 5.230516 | -0.076981 |
| I | -1.022272 | 2.729858 | -0.028262 |
| I | -2.038881 | 0.020947 | 0.064677  |
| N | -7.514003 | 3.292577 | 0.024763  |
| O | -7.946646 | 4.422884 | -0.011261 |
| O | -8.202902 | 2.298518 | 0.073987  |

**MECI-2(S<sub>0</sub>/S<sub>1</sub>)**

1,2,4-di-iodo methoxy benzene

|   |           |           |           |
|---|-----------|-----------|-----------|
| C | -5.291834 | 1.927894  | 0.060158  |
| C | -3.911057 | 2.043035  | 0.030023  |
| C | -3.337593 | 3.197446  | -0.025493 |
| C | -3.970504 | 4.424703  | -0.063935 |
| C | -5.356619 | 4.353399  | -0.036925 |
| C | -6.017305 | 3.112250  | 0.023896  |
| H | -5.756134 | 0.946201  | 0.109492  |
| H | -3.465484 | 5.380774  | -0.114221 |
| H | -5.959725 | 5.254122  | -0.064264 |
| I | -0.728986 | 1.857460  | 0.000971  |
| I | -2.961598 | -0.109415 | 0.082007  |
| O | -7.370668 | 3.155198  | 0.042357  |
| C | -8.061058 | 1.917154  | 0.067958  |
| H | -9.121267 | 2.156428  | 0.065489  |
| H | -7.820901 | 1.315166  | -0.813472 |
| H | -7.818781 | 1.347781  | 0.970176  |

**MECI-2(S<sub>0</sub>/S<sub>1</sub>)**

1,2,4-di-iodo hydroxy benzene

|   |           |           |           |
|---|-----------|-----------|-----------|
| C | -5.475956 | 1.842470  | 0.051394  |
| C | -4.104944 | 1.874905  | 0.029526  |
| C | -3.361783 | 2.926215  | -0.016898 |
| C | -3.878718 | 4.205133  | -0.054094 |
| C | -5.267073 | 4.276022  | -0.037273 |
| C | -6.055490 | 3.114516  | 0.015477  |
| H | -6.095387 | 0.954850  | 0.090667  |
| H | -3.265448 | 5.100111  | -0.093440 |
| H | -5.758853 | 5.242977  | -0.065516 |
| I | -0.925021 | 2.521617  | -0.046582 |
| I | -2.218376 | -0.043898 | 0.063377  |
| O | -7.412982 | 3.173368  | 0.033609  |
| H | -7.706752 | 4.088313  | 0.007421  |

**Vibrational frequencies for relevant energy stationary points concerning the 1,2-di-iodobenzene derivatives photolysis.**

**Min1(S<sub>0</sub>)**

**1,2-di-chloro benzene**

|     |                            |
|-----|----------------------------|
| 0:  | 0.00 cm** <sup>-1</sup>    |
| 1:  | 0.00 cm** <sup>-1</sup>    |
| 2:  | 0.00 cm** <sup>-1</sup>    |
| 3:  | 0.00 cm** <sup>-1</sup>    |
| 4:  | 0.00 cm** <sup>-1</sup>    |
| 5:  | 0.00 cm** <sup>-1</sup>    |
| 6:  | 131.92 cm** <sup>-1</sup>  |
| 7:  | 207.90 cm** <sup>-1</sup>  |
| 8:  | 239.90 cm** <sup>-1</sup>  |
| 9:  | 342.51 cm** <sup>-1</sup>  |
| 10: | 438.01 cm** <sup>-1</sup>  |
| 11: | 451.01 cm** <sup>-1</sup>  |
| 12: | 492.00 cm** <sup>-1</sup>  |
| 13: | 537.10 cm** <sup>-1</sup>  |
| 14: | 682.66 cm** <sup>-1</sup>  |
| 15: | 744.35 cm** <sup>-1</sup>  |
| 16: | 764.33 cm** <sup>-1</sup>  |
| 17: | 774.51 cm** <sup>-1</sup>  |
| 18: | 896.97 cm** <sup>-1</sup>  |
| 19: | 989.30 cm** <sup>-1</sup>  |
| 20: | 1024.78 cm** <sup>-1</sup> |
| 21: | 1061.66 cm** <sup>-1</sup> |
| 22: | 1071.23 cm** <sup>-1</sup> |
| 23: | 1156.98 cm** <sup>-1</sup> |
| 24: | 1167.79 cm** <sup>-1</sup> |
| 25: | 1179.58 cm** <sup>-1</sup> |
| 26: | 1284.54 cm** <sup>-1</sup> |
| 27: | 1286.68 cm** <sup>-1</sup> |
| 28: | 1481.57 cm** <sup>-1</sup> |
| 29: | 1514.45 cm** <sup>-1</sup> |
| 30: | 1655.65 cm** <sup>-1</sup> |
| 31: | 1666.29 cm** <sup>-1</sup> |
| 32: | 3216.68 cm** <sup>-1</sup> |
| 33: | 3227.78 cm** <sup>-1</sup> |
| 34: | 3236.69 cm** <sup>-1</sup> |
| 35: | 3241.45 cm** <sup>-1</sup> |

**Min2(S<sub>1</sub>)**

|     |                           |
|-----|---------------------------|
| 0:  | 0.00 cm** <sup>-1</sup>   |
| 1:  | 0.00 cm** <sup>-1</sup>   |
| 2:  | 0.00 cm** <sup>-1</sup>   |
| 3:  | 0.00 cm** <sup>-1</sup>   |
| 4:  | 0.00 cm** <sup>-1</sup>   |
| 5:  | 0.00 cm** <sup>-1</sup>   |
| 6:  | 0.00 cm** <sup>-1</sup>   |
| 7:  | 139.80 cm** <sup>-1</sup> |
| 8:  | 176.43 cm** <sup>-1</sup> |
| 9:  | 177.96 cm** <sup>-1</sup> |
| 10: | 316.26 cm** <sup>-1</sup> |

11: 390.31 cm\*\*-1  
12: 406.98 cm\*\*-1  
13: 494.82 cm\*\*-1  
14: 610.02 cm\*\*-1  
15: 694.74 cm\*\*-1  
16: 699.53 cm\*\*-1  
17: 757.37 cm\*\*-1  
18: 868.48 cm\*\*-1  
19: 950.80 cm\*\*-1  
20: 970.89 cm\*\*-1  
21: 1024.34 cm\*\*-1  
22: 1047.02 cm\*\*-1  
23: 1109.24 cm\*\*-1  
24: 1133.58 cm\*\*-1  
25: 1171.04 cm\*\*-1  
26: 1256.61 cm\*\*-1  
27: 1307.32 cm\*\*-1  
28: 1462.22 cm\*\*-1  
29: 1479.91 cm\*\*-1  
30: 1605.31 cm\*\*-1  
31: 1675.83 cm\*\*-1  
32: 3205.25 cm\*\*-1  
33: 3213.26 cm\*\*-1  
34: 3219.97 cm\*\*-1  
35: 3232.42 cm\*\*-1

### Min3(T<sub>i</sub>)

0: 0.00 cm\*\*-1  
1: 0.00 cm\*\*-1  
2: 0.00 cm\*\*-1  
3: 0.00 cm\*\*-1  
4: 0.00 cm\*\*-1  
5: 0.00 cm\*\*-1  
6: 14.53 cm\*\*-1  
7: 31.85 cm\*\*-1  
8: 51.60 cm\*\*-1  
9: 184.49 cm\*\*-1  
10: 287.48 cm\*\*-1  
11: 420.10 cm\*\*-1  
12: 424.37 cm\*\*-1  
13: 503.13 cm\*\*-1  
14: 623.11 cm\*\*-1  
15: 708.70 cm\*\*-1  
16: 715.24 cm\*\*-1  
17: 766.51 cm\*\*-1  
18: 882.16 cm\*\*-1  
19: 977.64 cm\*\*-1  
20: 988.28 cm\*\*-1  
21: 1022.20 cm\*\*-1  
22: 1051.01 cm\*\*-1  
23: 1120.24 cm\*\*-1  
24: 1137.78 cm\*\*-1  
25: 1172.27 cm\*\*-1  
26: 1250.22 cm\*\*-1

27: 1305.55 cm<sup>\*\*</sup>-1  
28: 1459.68 cm<sup>\*\*</sup>-1  
29: 1481.26 cm<sup>\*\*</sup>-1  
30: 1613.33 cm<sup>\*\*</sup>-1  
31: 1668.32 cm<sup>\*\*</sup>-1  
32: 3207.47 cm<sup>\*\*</sup>-1  
33: 3217.33 cm<sup>\*\*</sup>-1  
34: 3226.38 cm<sup>\*\*</sup>-1  
35: 3234.89 cm<sup>\*\*</sup>-1

**P(S<sub>0</sub>)**

0: 0.00 cm<sup>\*\*</sup>-1  
1: 0.00 cm<sup>\*\*</sup>-1  
2: 0.00 cm<sup>\*\*</sup>-1  
3: 0.00 cm<sup>\*\*</sup>-1  
4: 0.00 cm<sup>\*\*</sup>-1  
5: 0.00 cm<sup>\*\*</sup>-1  
6: 12.89 cm<sup>\*\*</sup>-1  
7: 27.64 cm<sup>\*\*</sup>-1  
8: 32.84 cm<sup>\*\*</sup>-1  
9: 47.70 cm<sup>\*\*</sup>-1  
10: 61.87 cm<sup>\*\*</sup>-1  
11: 387.93 cm<sup>\*\*</sup>-1  
12: 400.95 cm<sup>\*\*</sup>-1  
13: 460.29 cm<sup>\*\*</sup>-1  
14: 594.15 cm<sup>\*\*</sup>-1  
15: 626.15 cm<sup>\*\*</sup>-1  
16: 626.32 cm<sup>\*\*</sup>-1  
17: 778.16 cm<sup>\*\*</sup>-1  
18: 848.12 cm<sup>\*\*</sup>-1  
19: 901.01 cm<sup>\*\*</sup>-1  
20: 971.60 cm<sup>\*\*</sup>-1  
21: 1015.94 cm<sup>\*\*</sup>-1  
22: 1019.32 cm<sup>\*\*</sup>-1  
23: 1078.87 cm<sup>\*\*</sup>-1  
24: 1127.12 cm<sup>\*\*</sup>-1  
25: 1171.12 cm<sup>\*\*</sup>-1  
26: 1278.72 cm<sup>\*\*</sup>-1  
27: 1316.53 cm<sup>\*\*</sup>-1  
28: 1449.09 cm<sup>\*\*</sup>-1  
29: 1502.02 cm<sup>\*\*</sup>-1  
30: 1516.19 cm<sup>\*\*</sup>-1  
31: 2070.70 cm<sup>\*\*</sup>-1  
32: 3201.58 cm<sup>\*\*</sup>-1  
33: 3216.27 cm<sup>\*\*</sup>-1  
34: 3238.41 cm<sup>\*\*</sup>-1  
35: 3241.55 cm<sup>\*\*</sup>-1

**MECI-2(S<sub>0</sub>/S<sub>i</sub>)**

0: 0.00 cm<sup>\*\*</sup>-1  
1: 0.00 cm<sup>\*\*</sup>-1  
2: 0.00 cm<sup>\*\*</sup>-1  
3: 0.00 cm<sup>\*\*</sup>-1  
4: 0.00 cm<sup>\*\*</sup>-1

5: 0.00 cm\*\*<sup>-1</sup>  
6: 0.00 cm\*\*<sup>-1</sup>  
7: 0.00 cm\*\*<sup>-1</sup>  
8: 204.70 cm\*\*<sup>-1</sup>  
9: 290.19 cm\*\*<sup>-1</sup>  
10: 299.19 cm\*\*<sup>-1</sup>  
11: 411.95 cm\*\*<sup>-1</sup>  
12: 469.53 cm\*\*<sup>-1</sup>  
13: 545.03 cm\*\*<sup>-1</sup>  
14: 600.48 cm\*\*<sup>-1</sup>  
15: 679.74 cm\*\*<sup>-1</sup>  
16: 760.36 cm\*\*<sup>-1</sup>  
17: 886.81 cm\*\*<sup>-1</sup>  
18: 895.79 cm\*\*<sup>-1</sup>  
19: 918.86 cm\*\*<sup>-1</sup>  
20: 996.35 cm\*\*<sup>-1</sup>  
21: 1028.31 cm\*\*<sup>-1</sup>  
22: 1052.54 cm\*\*<sup>-1</sup>  
23: 1129.11 cm\*\*<sup>-1</sup>  
24: 1167.50 cm\*\*<sup>-1</sup>  
25: 1283.49 cm\*\*<sup>-1</sup>  
26: 1315.97 cm\*\*<sup>-1</sup>  
27: 1419.41 cm\*\*<sup>-1</sup>  
28: 1483.50 cm\*\*<sup>-1</sup>  
29: 1603.55 cm\*\*<sup>-1</sup>  
30: 1669.26 cm\*\*<sup>-1</sup>  
31: 2725.98 cm\*\*<sup>-1</sup>  
32: 3208.68 cm\*\*<sup>-1</sup>  
33: 3227.80 cm\*\*<sup>-1</sup>  
34: 3231.02 cm\*\*<sup>-1</sup>  
35: 3319.47 cm\*\*<sup>-1</sup>

#### Min1(S<sub>0</sub>)

##### 1,2-di-bromo benzene

0: 0.00 cm\*\*<sup>-1</sup>  
1: 0.00 cm\*\*<sup>-1</sup>  
2: 0.00 cm\*\*<sup>-1</sup>  
3: 0.00 cm\*\*<sup>-1</sup>  
4: 0.00 cm\*\*<sup>-1</sup>  
5: 0.00 cm\*\*<sup>-1</sup>  
6: 106.73 cm\*\*<sup>-1</sup>  
7: 134.16 cm\*\*<sup>-1</sup>  
8: 217.10 cm\*\*<sup>-1</sup>  
9: 258.74 cm\*\*<sup>-1</sup>  
10: 369.83 cm\*\*<sup>-1</sup>  
11: 392.44 cm\*\*<sup>-1</sup>  
12: 445.19 cm\*\*<sup>-1</sup>  
13: 522.45 cm\*\*<sup>-1</sup>  
14: 661.97 cm\*\*<sup>-1</sup>  
15: 727.24 cm\*\*<sup>-1</sup>  
16: 739.48 cm\*\*<sup>-1</sup>  
17: 772.84 cm\*\*<sup>-1</sup>  
18: 896.67 cm\*\*<sup>-1</sup>  
19: 990.13 cm\*\*<sup>-1</sup>  
20: 1026.52 cm\*\*<sup>-1</sup>  
21: 1039.50 cm\*\*<sup>-1</sup>

22: 1071.55 cm\*\*<sup>-1</sup>  
23: 1148.10 cm\*\*<sup>-1</sup>  
24: 1152.26 cm\*\*<sup>-1</sup>  
25: 1176.75 cm\*\*<sup>-1</sup>  
26: 1283.53 cm\*\*<sup>-1</sup>  
27: 1284.80 cm\*\*<sup>-1</sup>  
28: 1475.55 cm\*\*<sup>-1</sup>  
29: 1507.01 cm\*\*<sup>-1</sup>  
30: 1650.64 cm\*\*<sup>-1</sup>  
31: 1660.33 cm\*\*<sup>-1</sup>  
32: 3216.69 cm\*\*<sup>-1</sup>  
33: 3227.47 cm\*\*<sup>-1</sup>  
34: 3236.05 cm\*\*<sup>-1</sup>  
35: 3241.23 cm\*\*<sup>-1</sup>

**Min2(S<sub>i</sub>)**

0: 0.00 cm\*\*<sup>-1</sup>  
1: 0.00 cm\*\*<sup>-1</sup>  
2: 0.00 cm\*\*<sup>-1</sup>  
3: 0.00 cm\*\*<sup>-1</sup>  
4: 0.00 cm\*\*<sup>-1</sup>  
5: 0.00 cm\*\*<sup>-1</sup>  
6: 0.00 cm\*\*<sup>-1</sup>  
7: 118.85 cm\*\*<sup>-1</sup>  
8: 150.80 cm\*\*<sup>-1</sup>  
9: 162.83 cm\*\*<sup>-1</sup>  
10: 274.04 cm\*\*<sup>-1</sup>  
11: 316.26 cm\*\*<sup>-1</sup>  
12: 404.89 cm\*\*<sup>-1</sup>  
13: 483.90 cm\*\*<sup>-1</sup>  
14: 612.53 cm\*\*<sup>-1</sup>  
15: 660.76 cm\*\*<sup>-1</sup>  
16: 707.58 cm\*\*<sup>-1</sup>  
17: 761.27 cm\*\*<sup>-1</sup>  
18: 881.93 cm\*\*<sup>-1</sup>  
19: 951.30 cm\*\*<sup>-1</sup>  
20: 976.78 cm\*\*<sup>-1</sup>  
21: 1024.35 cm\*\*<sup>-1</sup>  
22: 1048.32 cm\*\*<sup>-1</sup>  
23: 1082.16 cm\*\*<sup>-1</sup>  
24: 1133.68 cm\*\*<sup>-1</sup>  
25: 1164.94 cm\*\*<sup>-1</sup>  
26: 1269.63 cm\*\*<sup>-1</sup>  
27: 1308.11 cm\*\*<sup>-1</sup>  
28: 1465.88 cm\*\*<sup>-1</sup>  
29: 1471.54 cm\*\*<sup>-1</sup>  
30: 1611.84 cm\*\*<sup>-1</sup>  
31: 1668.63 cm\*\*<sup>-1</sup>  
32: 3199.56 cm\*\*<sup>-1</sup>  
33: 3208.20 cm\*\*<sup>-1</sup>  
34: 3215.34 cm\*\*<sup>-1</sup>  
35: 3230.20 cm\*\*<sup>-1</sup>

**Min3(T<sub>i</sub>)**

0: 0.00 cm\*\*<sup>-1</sup>  
1: 0.00 cm\*\*<sup>-1</sup>  
2: 0.00 cm\*\*<sup>-1</sup>  
3: 0.00 cm\*\*<sup>-1</sup>  
4: 0.00 cm\*\*<sup>-1</sup>  
5: 0.00 cm\*\*<sup>-1</sup>  
6: 0.00 cm\*\*<sup>-1</sup>  
7: 12.81 cm\*\*<sup>-1</sup>  
8: 49.44 cm\*\*<sup>-1</sup>  
9: 169.50 cm\*\*<sup>-1</sup>  
10: 240.17 cm\*\*<sup>-1</sup>  
11: 325.34 cm\*\*<sup>-1</sup>  
12: 417.04 cm\*\*<sup>-1</sup>  
13: 491.24 cm\*\*<sup>-1</sup>  
14: 621.91 cm\*\*<sup>-1</sup>  
15: 683.09 cm\*\*<sup>-1</sup>  
16: 708.61 cm\*\*<sup>-1</sup>  
17: 762.97 cm\*\*<sup>-1</sup>  
18: 877.96 cm\*\*<sup>-1</sup>  
19: 978.28 cm\*\*<sup>-1</sup>  
20: 984.51 cm\*\*<sup>-1</sup>  
21: 1025.42 cm\*\*<sup>-1</sup>  
22: 1049.49 cm\*\*<sup>-1</sup>  
23: 1110.07 cm\*\*<sup>-1</sup>  
24: 1132.96 cm\*\*<sup>-1</sup>  
25: 1171.70 cm\*\*<sup>-1</sup>  
26: 1249.49 cm\*\*<sup>-1</sup>  
27: 1307.33 cm\*\*<sup>-1</sup>  
28: 1458.39 cm\*\*<sup>-1</sup>  
29: 1477.93 cm\*\*<sup>-1</sup>  
30: 1611.38 cm\*\*<sup>-1</sup>  
31: 1664.30 cm\*\*<sup>-1</sup>  
32: 3207.04 cm\*\*<sup>-1</sup>  
33: 3216.05 cm\*\*<sup>-1</sup>  
34: 3222.50 cm\*\*<sup>-1</sup>  
35: 3233.48 cm\*\*<sup>-1</sup>

**P(S<sub>0</sub>)**

0: 0.00 cm\*\*<sup>-1</sup>  
1: 0.00 cm\*\*<sup>-1</sup>  
2: 0.00 cm\*\*<sup>-1</sup>  
3: 0.00 cm\*\*<sup>-1</sup>  
4: 0.00 cm\*\*<sup>-1</sup>  
5: 0.00 cm\*\*<sup>-1</sup>  
6: 0.00 cm\*\*<sup>-1</sup>  
7: 18.00 cm\*\*<sup>-1</sup>  
8: 30.18 cm\*\*<sup>-1</sup>  
9: 40.41 cm\*\*<sup>-1</sup>  
10: 60.50 cm\*\*<sup>-1</sup>  
11: 344.62 cm\*\*<sup>-1</sup>  
12: 389.76 cm\*\*<sup>-1</sup>  
13: 401.44 cm\*\*<sup>-1</sup>  
14: 461.27 cm\*\*<sup>-1</sup>  
15: 624.69 cm\*\*<sup>-1</sup>



16: 626.60 cm<sup>\*\*</sup>-1  
17: 772.03 cm<sup>\*\*</sup>-1  
18: 848.02 cm<sup>\*\*</sup>-1  
19: 900.44 cm<sup>\*\*</sup>-1  
20: 968.76 cm<sup>\*\*</sup>-1  
21: 1014.56 cm<sup>\*\*</sup>-1  
22: 1016.46 cm<sup>\*\*</sup>-1  
23: 1079.16 cm<sup>\*\*</sup>-1  
24: 1124.00 cm<sup>\*\*</sup>-1  
25: 1166.31 cm<sup>\*\*</sup>-1  
26: 1277.81 cm<sup>\*\*</sup>-1  
27: 1315.99 cm<sup>\*\*</sup>-1  
28: 1447.40 cm<sup>\*\*</sup>-1  
29: 1500.87 cm<sup>\*\*</sup>-1  
30: 1515.84 cm<sup>\*\*</sup>-1  
31: 2069.40 cm<sup>\*\*</sup>-1  
32: 3201.54 cm<sup>\*\*</sup>-1  
33: 3216.19 cm<sup>\*\*</sup>-1  
34: 3238.21 cm<sup>\*\*</sup>-1  
35: 3241.56 cm<sup>\*\*</sup>-1

**MECI-2(S<sub>0</sub>/S<sub>i</sub>)**

0: 0.00 cm<sup>\*\*</sup>-1  
1: 0.00 cm<sup>\*\*</sup>-1  
2: 0.00 cm<sup>\*\*</sup>-1  
3: 0.00 cm<sup>\*\*</sup>-1  
4: 0.00 cm<sup>\*\*</sup>-1  
5: 0.00 cm<sup>\*\*</sup>-1  
6: 0.00 cm<sup>\*\*</sup>-1  
7: 0.00 cm<sup>\*\*</sup>-1  
8: 0.00 cm<sup>\*\*</sup>-1  
9: 164.41 cm<sup>\*\*</sup>-1  
10: 174.20 cm<sup>\*\*</sup>-1  
11: 406.70 cm<sup>\*\*</sup>-1  
12: 428.51 cm<sup>\*\*</sup>-1  
13: 464.54 cm<sup>\*\*</sup>-1  
14: 552.58 cm<sup>\*\*</sup>-1  
15: 673.24 cm<sup>\*\*</sup>-1  
16: 742.34 cm<sup>\*\*</sup>-1  
17: 753.40 cm<sup>\*\*</sup>-1  
18: 881.58 cm<sup>\*\*</sup>-1  
19: 893.64 cm<sup>\*\*</sup>-1  
20: 994.28 cm<sup>\*\*</sup>-1  
21: 1040.06 cm<sup>\*\*</sup>-1  
22: 1043.99 cm<sup>\*\*</sup>-1  
23: 1120.66 cm<sup>\*\*</sup>-1  
24: 1166.26 cm<sup>\*\*</sup>-1  
25: 1269.38 cm<sup>\*\*</sup>-1  
26: 1303.02 cm<sup>\*\*</sup>-1  
27: 1427.57 cm<sup>\*\*</sup>-1  
28: 1432.51 cm<sup>\*\*</sup>-1  
29: 1524.82 cm<sup>\*\*</sup>-1  
30: 1611.26 cm<sup>\*\*</sup>-1  
31: 3061.39 cm<sup>\*\*</sup>-1  
32: 3207.33 cm<sup>\*\*</sup>-1

33: 3218.13 cm<sup>\*\*</sup>-1  
34: 3228.42 cm<sup>\*\*</sup>-1  
35: 4917.31 cm<sup>\*\*</sup>-1

**Min1(S<sub>0</sub>)**

**1,2-di-iodo benzene**

0: 0.00 cm<sup>\*\*</sup>-1  
1: 0.00 cm<sup>\*\*</sup>-1  
2: 0.00 cm<sup>\*\*</sup>-1  
3: 0.00 cm<sup>\*\*</sup>-1  
4: 0.00 cm<sup>\*\*</sup>-1  
5: 0.00 cm<sup>\*\*</sup>-1  
6: 91.96 cm<sup>\*\*</sup>-1  
7: 101.03 cm<sup>\*\*</sup>-1  
8: 197.32 cm<sup>\*\*</sup>-1  
9: 214.35 cm<sup>\*\*</sup>-1  
10: 328.29 cm<sup>\*\*</sup>-1  
11: 335.61 cm<sup>\*\*</sup>-1  
12: 437.89 cm<sup>\*\*</sup>-1  
13: 505.84 cm<sup>\*\*</sup>-1  
14: 654.01 cm<sup>\*\*</sup>-1  
15: 707.03 cm<sup>\*\*</sup>-1  
16: 731.44 cm<sup>\*\*</sup>-1  
17: 768.40 cm<sup>\*\*</sup>-1  
18: 894.17 cm<sup>\*\*</sup>-1  
19: 987.83 cm<sup>\*\*</sup>-1  
20: 1024.95 cm<sup>\*\*</sup>-1  
21: 1025.06 cm<sup>\*\*</sup>-1  
22: 1070.62 cm<sup>\*\*</sup>-1  
23: 1132.96 cm<sup>\*\*</sup>-1  
24: 1147.85 cm<sup>\*\*</sup>-1  
25: 1180.01 cm<sup>\*\*</sup>-1  
26: 1274.02 cm<sup>\*\*</sup>-1  
27: 1289.44 cm<sup>\*\*</sup>-1  
28: 1467.76 cm<sup>\*\*</sup>-1  
29: 1499.50 cm<sup>\*\*</sup>-1  
30: 1642.63 cm<sup>\*\*</sup>-1  
31: 1653.61 cm<sup>\*\*</sup>-1  
32: 3214.82 cm<sup>\*\*</sup>-1  
33: 3224.43 cm<sup>\*\*</sup>-1  
34: 3232.04 cm<sup>\*\*</sup>-1  
35: 3238.66 cm<sup>\*\*</sup>-1

**Min2(S<sub>1</sub>)**

0: 0.00 cm<sup>\*\*</sup>-1  
1: 0.00 cm<sup>\*\*</sup>-1  
2: 0.00 cm<sup>\*\*</sup>-1  
3: 0.00 cm<sup>\*\*</sup>-1  
4: 0.00 cm<sup>\*\*</sup>-1  
5: 0.00 cm<sup>\*\*</sup>-1  
6: 48.65 cm<sup>\*\*</sup>-1  
7: 81.28 cm<sup>\*\*</sup>-1  
8: 117.64 cm<sup>\*\*</sup>-1  
9: 147.62 cm<sup>\*\*</sup>-1  
10: 251.91 cm<sup>\*\*</sup>-1

11: 263.20 cm\*\*-1  
12: 407.81 cm\*\*-1  
13: 479.02 cm\*\*-1  
14: 618.54 cm\*\*-1  
15: 639.46 cm\*\*-1  
16: 708.24 cm\*\*-1  
17: 761.66 cm\*\*-1  
18: 886.06 cm\*\*-1  
19: 955.16 cm\*\*-1  
20: 972.03 cm\*\*-1  
21: 1019.74 cm\*\*-1  
22: 1048.49 cm\*\*-1  
23: 1067.02 cm\*\*-1  
24: 1132.54 cm\*\*-1  
25: 1164.55 cm\*\*-1  
26: 1273.47 cm\*\*-1  
27: 1316.51 cm\*\*-1  
28: 1463.59 cm\*\*-1  
29: 1471.88 cm\*\*-1  
30: 1612.82 cm\*\*-1  
31: 1659.36 cm\*\*-1  
32: 3188.33 cm\*\*-1  
33: 3201.27 cm\*\*-1  
34: 3209.53 cm\*\*-1  
35: 3226.43 cm\*\*-1

### Min3(T<sub>i</sub>)

0: 0.00 cm\*\*-1  
1: 0.00 cm\*\*-1  
2: 0.00 cm\*\*-1  
3: 0.00 cm\*\*-1  
4: 0.00 cm\*\*-1  
5: 0.00 cm\*\*-1  
6: 23.60 cm\*\*-1  
7: 35.11 cm\*\*-1  
8: 53.90 cm\*\*-1  
9: 157.19 cm\*\*-1  
10: 210.19 cm\*\*-1  
11: 276.74 cm\*\*-1  
12: 426.49 cm\*\*-1  
13: 482.92 cm\*\*-1  
14: 621.80 cm\*\*-1  
15: 667.80 cm\*\*-1  
16: 706.66 cm\*\*-1  
17: 772.84 cm\*\*-1  
18: 894.25 cm\*\*-1  
19: 981.58 cm\*\*-1  
20: 989.21 cm\*\*-1  
21: 1029.55 cm\*\*-1  
22: 1052.13 cm\*\*-1  
23: 1102.03 cm\*\*-1  
24: 1135.14 cm\*\*-1  
25: 1177.51 cm\*\*-1  
26: 1254.50 cm\*\*-1

27: 1307.31 cm<sup>\*\*</sup>-1  
28: 1455.59 cm<sup>\*\*</sup>-1  
29: 1478.00 cm<sup>\*\*</sup>-1  
30: 1607.69 cm<sup>\*\*</sup>-1  
31: 1658.75 cm<sup>\*\*</sup>-1  
32: 3205.39 cm<sup>\*\*</sup>-1  
33: 3214.45 cm<sup>\*\*</sup>-1  
34: 3222.08 cm<sup>\*\*</sup>-1  
35: 3231.43 cm<sup>\*\*</sup>-1

### **P(S<sub>0</sub>)**

Benzynes + I<sub>2</sub>

0: 0.00 cm<sup>\*\*</sup>-1  
1: 0.00 cm<sup>\*\*</sup>-1  
2: 0.00 cm<sup>\*\*</sup>-1  
3: 0.00 cm<sup>\*\*</sup>-1  
4: 0.00 cm<sup>\*\*</sup>-1  
5: 0.00 cm<sup>\*\*</sup>-1  
6: 0.00 cm<sup>\*\*</sup>-1  
7: 0.00 cm<sup>\*\*</sup>-1  
8: 0.00 cm<sup>\*\*</sup>-1  
9: 43.48 cm<sup>\*\*</sup>-1  
10: 55.85 cm<sup>\*\*</sup>-1  
11: 230.38 cm<sup>\*\*</sup>-1  
12: 387.90 cm<sup>\*\*</sup>-1  
13: 399.08 cm<sup>\*\*</sup>-1  
14: 454.09 cm<sup>\*\*</sup>-1  
15: 619.81 cm<sup>\*\*</sup>-1  
16: 625.82 cm<sup>\*\*</sup>-1  
17: 755.79 cm<sup>\*\*</sup>-1  
18: 848.98 cm<sup>\*\*</sup>-1  
19: 886.95 cm<sup>\*\*</sup>-1  
20: 957.13 cm<sup>\*\*</sup>-1  
21: 1005.65 cm<sup>\*\*</sup>-1  
22: 1014.00 cm<sup>\*\*</sup>-1  
23: 1077.75 cm<sup>\*\*</sup>-1  
24: 1118.43 cm<sup>\*\*</sup>-1  
25: 1157.49 cm<sup>\*\*</sup>-1  
26: 1275.50 cm<sup>\*\*</sup>-1  
27: 1314.84 cm<sup>\*\*</sup>-1  
28: 1445.12 cm<sup>\*\*</sup>-1  
29: 1499.47 cm<sup>\*\*</sup>-1  
30: 1515.50 cm<sup>\*\*</sup>-1  
31: 2065.60 cm<sup>\*\*</sup>-1  
32: 3201.97 cm<sup>\*\*</sup>-1  
33: 3216.82 cm<sup>\*\*</sup>-1  
34: 3239.40 cm<sup>\*\*</sup>-1  
35: 3241.78 cm<sup>\*\*</sup>-1

### **MECI-2(S<sub>0</sub>/S<sub>i</sub>)**

0: 0.00 cm<sup>\*\*</sup>-1  
1: 0.00 cm<sup>\*\*</sup>-1  
2: 0.00 cm<sup>\*\*</sup>-1  
3: 0.00 cm<sup>\*\*</sup>-1  
4: 0.00 cm<sup>\*\*</sup>-1

5: 0.00 cm\*\*<sup>-1</sup>  
6: 0.00 cm\*\*<sup>-1</sup>  
7: 46.58 cm\*\*<sup>-1</sup>  
8: 119.41 cm\*\*<sup>-1</sup>  
9: 143.71 cm\*\*<sup>-1</sup>  
10: 174.35 cm\*\*<sup>-1</sup>  
11: 401.23 cm\*\*<sup>-1</sup>  
12: 418.60 cm\*\*<sup>-1</sup>  
13: 470.76 cm\*\*<sup>-1</sup>  
14: 565.51 cm\*\*<sup>-1</sup>  
15: 651.27 cm\*\*<sup>-1</sup>  
16: 678.15 cm\*\*<sup>-1</sup>  
17: 767.76 cm\*\*<sup>-1</sup>  
18: 881.50 cm\*\*<sup>-1</sup>  
19: 936.02 cm\*\*<sup>-1</sup>  
20: 981.26 cm\*\*<sup>-1</sup>  
21: 1021.90 cm\*\*<sup>-1</sup>  
22: 1041.07 cm\*\*<sup>-1</sup>  
23: 1110.24 cm\*\*<sup>-1</sup>  
24: 1164.16 cm\*\*<sup>-1</sup>  
25: 1214.21 cm\*\*<sup>-1</sup>  
26: 1279.48 cm\*\*<sup>-1</sup>  
27: 1341.64 cm\*\*<sup>-1</sup>  
28: 1474.06 cm\*\*<sup>-1</sup>  
29: 1501.86 cm\*\*<sup>-1</sup>  
30: 1626.01 cm\*\*<sup>-1</sup>  
31: 1816.79 cm\*\*<sup>-1</sup>  
32: 3171.69 cm\*\*<sup>-1</sup>  
33: 3203.93 cm\*\*<sup>-1</sup>  
34: 3223.15 cm\*\*<sup>-1</sup>

**Min1(S<sub>0</sub>)**

**1,2,4 di-iodo methyl benzene**

0: 0.00 cm\*\*<sup>-1</sup>  
1: 0.00 cm\*\*<sup>-1</sup>  
2: 0.00 cm\*\*<sup>-1</sup>  
3: 0.00 cm\*\*<sup>-1</sup>  
4: 0.00 cm\*\*<sup>-1</sup>  
5: 0.00 cm\*\*<sup>-1</sup>  
6: 58.09 cm\*\*<sup>-1</sup>  
7: 81.21 cm\*\*<sup>-1</sup>  
8: 100.40 cm\*\*<sup>-1</sup>  
9: 151.83 cm\*\*<sup>-1</sup>  
10: 175.50 cm\*\*<sup>-1</sup>  
11: 268.13 cm\*\*<sup>-1</sup>  
12: 293.87 cm\*\*<sup>-1</sup>  
13: 318.57 cm\*\*<sup>-1</sup>  
14: 411.48 cm\*\*<sup>-1</sup>  
15: 442.87 cm\*\*<sup>-1</sup>  
16: 546.83 cm\*\*<sup>-1</sup>  
17: 596.38 cm\*\*<sup>-1</sup>  
18: 683.87 cm\*\*<sup>-1</sup>  
19: 728.66 cm\*\*<sup>-1</sup>  
20: 836.96 cm\*\*<sup>-1</sup>  
21: 862.56 cm\*\*<sup>-1</sup>  
22: 911.83 cm\*\*<sup>-1</sup>

23: 993.91 cm\*\*<sup>-1</sup>  
24: 1018.34 cm\*\*<sup>-1</sup>  
25: 1038.89 cm\*\*<sup>-1</sup>  
26: 1075.10 cm\*\*<sup>-1</sup>  
27: 1140.34 cm\*\*<sup>-1</sup>  
28: 1166.90 cm\*\*<sup>-1</sup>  
29: 1245.78 cm\*\*<sup>-1</sup>  
30: 1276.75 cm\*\*<sup>-1</sup>  
31: 1295.38 cm\*\*<sup>-1</sup>  
32: 1418.36 cm\*\*<sup>-1</sup>  
33: 1421.64 cm\*\*<sup>-1</sup>  
34: 1484.82 cm\*\*<sup>-1</sup>  
35: 1487.93 cm\*\*<sup>-1</sup>  
36: 1517.90 cm\*\*<sup>-1</sup>  
37: 1631.02 cm\*\*<sup>-1</sup>  
38: 1672.36 cm\*\*<sup>-1</sup>  
39: 3070.42 cm\*\*<sup>-1</sup>  
40: 3141.96 cm\*\*<sup>-1</sup>  
41: 3163.88 cm\*\*<sup>-1</sup>  
42: 3205.79 cm\*\*<sup>-1</sup>  
43: 3216.22 cm\*\*<sup>-1</sup>  
44: 3228.75 cm\*\*<sup>-1</sup>

**Min2(S<sub>i</sub>)**

0: 0.00 cm\*\*<sup>-1</sup>  
1: 0.00 cm\*\*<sup>-1</sup>  
2: 0.00 cm\*\*<sup>-1</sup>  
3: 0.00 cm\*\*<sup>-1</sup>  
4: 0.00 cm\*\*<sup>-1</sup>  
5: 0.00 cm\*\*<sup>-1</sup>  
6: 47.67 cm\*\*<sup>-1</sup>  
7: 79.06 cm\*\*<sup>-1</sup>  
8: 91.11 cm\*\*<sup>-1</sup>  
9: 103.27 cm\*\*<sup>-1</sup>  
10: 112.64 cm\*\*<sup>-1</sup>  
11: 224.67 cm\*\*<sup>-1</sup>  
12: 238.16 cm\*\*<sup>-1</sup>  
13: 283.01 cm\*\*<sup>-1</sup>  
14: 379.28 cm\*\*<sup>-1</sup>  
15: 413.31 cm\*\*<sup>-1</sup>  
16: 511.37 cm\*\*<sup>-1</sup>  
17: 565.23 cm\*\*<sup>-1</sup>  
18: 634.70 cm\*\*<sup>-1</sup>  
19: 711.54 cm\*\*<sup>-1</sup>  
20: 788.18 cm\*\*<sup>-1</sup>  
21: 830.21 cm\*\*<sup>-1</sup>  
22: 900.58 cm\*\*<sup>-1</sup>  
23: 981.49 cm\*\*<sup>-1</sup>  
24: 989.64 cm\*\*<sup>-1</sup>  
25: 1022.53 cm\*\*<sup>-1</sup>  
26: 1072.07 cm\*\*<sup>-1</sup>  
27: 1077.06 cm\*\*<sup>-1</sup>  
28: 1153.85 cm\*\*<sup>-1</sup>  
29: 1229.89 cm\*\*<sup>-1</sup>  
30: 1279.78 cm\*\*<sup>-1</sup>

31: 1306.06 cm\*\*-1  
32: 1417.52 cm\*\*-1  
33: 1420.26 cm\*\*-1  
34: 1486.73 cm\*\*-1  
35: 1487.71 cm\*\*-1  
36: 1493.18 cm\*\*-1  
37: 1616.71 cm\*\*-1  
38: 1663.61 cm\*\*-1  
39: 3068.21 cm\*\*-1  
40: 3139.41 cm\*\*-1  
41: 3161.13 cm\*\*-1  
42: 3177.29 cm\*\*-1  
43: 3194.01 cm\*\*-1  
44: 3209.54 cm\*\*-1

**Min3(T<sub>i</sub>)**

0: 0.00 cm\*\*-1  
1: 0.00 cm\*\*-1  
2: 0.00 cm\*\*-1  
3: 0.00 cm\*\*-1  
4: 0.00 cm\*\*-1  
5: 0.00 cm\*\*-1  
6: 17.51 cm\*\*-1  
7: 39.32 cm\*\*-1  
8: 71.76 cm\*\*-1  
9: 88.40 cm\*\*-1  
10: 122.59 cm\*\*-1  
11: 181.48 cm\*\*-1  
12: 251.48 cm\*\*-1  
13: 280.91 cm\*\*-1  
14: 365.17 cm\*\*-1  
15: 419.41 cm\*\*-1  
16: 517.18 cm\*\*-1  
17: 588.57 cm\*\*-1  
18: 640.61 cm\*\*-1  
19: 699.95 cm\*\*-1  
20: 803.01 cm\*\*-1  
21: 845.57 cm\*\*-1  
22: 884.35 cm\*\*-1  
23: 997.69 cm\*\*-1  
24: 1004.34 cm\*\*-1  
25: 1017.15 cm\*\*-1  
26: 1073.55 cm\*\*-1  
27: 1105.81 cm\*\*-1  
28: 1166.45 cm\*\*-1  
29: 1225.39 cm\*\*-1  
30: 1265.07 cm\*\*-1  
31: 1295.49 cm\*\*-1  
32: 1416.16 cm\*\*-1  
33: 1418.96 cm\*\*-1  
34: 1480.90 cm\*\*-1  
35: 1485.78 cm\*\*-1  
36: 1506.45 cm\*\*-1  
37: 1599.14 cm\*\*-1  
38: 1669.60 cm\*\*-1

39: 3075.41 cm\*\*<sup>-1</sup>  
40: 3144.90 cm\*\*<sup>-1</sup>  
41: 3169.70 cm\*\*<sup>-1</sup>  
42: 3203.00 cm\*\*<sup>-1</sup>  
43: 3204.99 cm\*\*<sup>-1</sup>  
44: 3220.92 cm\*\*<sup>-1</sup>

**P(S<sub>0</sub>)**

0: 0.00 cm\*\*<sup>-1</sup>  
1: 0.00 cm\*\*<sup>-1</sup>  
2: 0.00 cm\*\*<sup>-1</sup>  
3: 0.00 cm\*\*<sup>-1</sup>  
4: 0.00 cm\*\*<sup>-1</sup>  
5: 0.00 cm\*\*<sup>-1</sup>  
6: 0.00 cm\*\*<sup>-1</sup>  
7: 0.00 cm\*\*<sup>-1</sup>  
8: 15.94 cm\*\*<sup>-1</sup>  
9: 36.34 cm\*\*<sup>-1</sup>  
10: 41.54 cm\*\*<sup>-1</sup>  
11: 180.69 cm\*\*<sup>-1</sup>  
12: 231.02 cm\*\*<sup>-1</sup>  
13: 240.67 cm\*\*<sup>-1</sup>  
14: 361.93 cm\*\*<sup>-1</sup>  
15: 376.85 cm\*\*<sup>-1</sup>  
16: 407.76 cm\*\*<sup>-1</sup>  
17: 466.54 cm\*\*<sup>-1</sup>  
18: 584.76 cm\*\*<sup>-1</sup>  
19: 645.14 cm\*\*<sup>-1</sup>  
20: 689.95 cm\*\*<sup>-1</sup>  
21: 835.86 cm\*\*<sup>-1</sup>  
22: 910.99 cm\*\*<sup>-1</sup>  
23: 936.66 cm\*\*<sup>-1</sup>  
24: 982.58 cm\*\*<sup>-1</sup>  
25: 1018.61 cm\*\*<sup>-1</sup>  
26: 1072.96 cm\*\*<sup>-1</sup>  
27: 1075.02 cm\*\*<sup>-1</sup>  
28: 1149.71 cm\*\*<sup>-1</sup>  
29: 1218.85 cm\*\*<sup>-1</sup>  
30: 1273.87 cm\*\*<sup>-1</sup>  
31: 1327.64 cm\*\*<sup>-1</sup>  
32: 1402.32 cm\*\*<sup>-1</sup>  
33: 1421.87 cm\*\*<sup>-1</sup>  
34: 1476.75 cm\*\*<sup>-1</sup>  
35: 1487.86 cm\*\*<sup>-1</sup>  
36: 1506.92 cm\*\*<sup>-1</sup>  
37: 1552.56 cm\*\*<sup>-1</sup>  
38: 2072.41 cm\*\*<sup>-1</sup>  
39: 3070.36 cm\*\*<sup>-1</sup>  
40: 3141.49 cm\*\*<sup>-1</sup>  
41: 3160.80 cm\*\*<sup>-1</sup>  
42: 3195.67 cm\*\*<sup>-1</sup>  
43: 3224.68 cm\*\*<sup>-1</sup>  
44: 3234.07 cm\*\*<sup>-1</sup>

**MECI-2(S<sub>0</sub>/S<sub>1</sub>)**



0: 0.00 cm\*\*<sup>-1</sup>  
1: 0.00 cm\*\*<sup>-1</sup>  
2: 0.00 cm\*\*<sup>-1</sup>  
3: 0.00 cm\*\*<sup>-1</sup>  
4: 0.00 cm\*\*<sup>-1</sup>  
5: 0.00 cm\*\*<sup>-1</sup>  
6: 0.00 cm\*\*<sup>-1</sup>  
7: 38.14 cm\*\*<sup>-1</sup>  
8: 50.36 cm\*\*<sup>-1</sup>  
9: 81.49 cm\*\*<sup>-1</sup>  
10: 119.48 cm\*\*<sup>-1</sup>  
11: 163.69 cm\*\*<sup>-1</sup>  
12: 260.53 cm\*\*<sup>-1</sup>  
13: 312.60 cm\*\*<sup>-1</sup>  
14: 394.21 cm\*\*<sup>-1</sup>  
15: 417.33 cm\*\*<sup>-1</sup>  
16: 474.23 cm\*\*<sup>-1</sup>  
17: 495.25 cm\*\*<sup>-1</sup>  
18: 523.35 cm\*\*<sup>-1</sup>  
19: 679.39 cm\*\*<sup>-1</sup>  
20: 744.61 cm\*\*<sup>-1</sup>  
21: 828.53 cm\*\*<sup>-1</sup>  
22: 885.75 cm\*\*<sup>-1</sup>  
23: 965.50 cm\*\*<sup>-1</sup>  
24: 986.03 cm\*\*<sup>-1</sup>  
25: 1024.06 cm\*\*<sup>-1</sup>  
26: 1049.61 cm\*\*<sup>-1</sup>  
27: 1072.37 cm\*\*<sup>-1</sup>  
28: 1148.74 cm\*\*<sup>-1</sup>  
29: 1211.20 cm\*\*<sup>-1</sup>  
30: 1266.99 cm\*\*<sup>-1</sup>  
31: 1326.11 cm\*\*<sup>-1</sup>  
32: 1393.64 cm\*\*<sup>-1</sup>  
33: 1422.37 cm\*\*<sup>-1</sup>  
34: 1485.90 cm\*\*<sup>-1</sup>  
35: 1488.34 cm\*\*<sup>-1</sup>  
36: 1518.35 cm\*\*<sup>-1</sup>  
37: 1590.81 cm\*\*<sup>-1</sup>  
38: 1772.85 cm\*\*<sup>-1</sup>  
39: 3070.73 cm\*\*<sup>-1</sup>  
40: 3140.38 cm\*\*<sup>-1</sup>  
41: 3159.37 cm\*\*<sup>-1</sup>  
42: 3194.88 cm\*\*<sup>-1</sup>  
43: 3208.95 cm\*\*<sup>-1</sup>  
44: 3210.22 cm\*\*<sup>-1</sup>

**Min1(S<sub>0</sub>)**

**1,2,4- di-iodo formyl benzene**

0: 0.00 cm\*\*<sup>-1</sup>  
1: 0.00 cm\*\*<sup>-1</sup>  
2: 0.00 cm\*\*<sup>-1</sup>  
3: 0.00 cm\*\*<sup>-1</sup>  
4: 0.00 cm\*\*<sup>-1</sup>  
5: 0.00 cm\*\*<sup>-1</sup>  
6: 44.18 cm\*\*<sup>-1</sup>  
7: 75.33 cm\*\*<sup>-1</sup>

8: 100.44 cm\*\*<sup>-1</sup>  
9: 128.94 cm\*\*<sup>-1</sup>  
10: 176.04 cm\*\*<sup>-1</sup>  
11: 241.94 cm\*\*<sup>-1</sup>  
12: 264.88 cm\*\*<sup>-1</sup>  
13: 283.68 cm\*\*<sup>-1</sup>  
14: 352.09 cm\*\*<sup>-1</sup>  
15: 444.72 cm\*\*<sup>-1</sup>  
16: 520.81 cm\*\*<sup>-1</sup>  
17: 539.87 cm\*\*<sup>-1</sup>  
18: 662.38 cm\*\*<sup>-1</sup>  
19: 729.01 cm\*\*<sup>-1</sup>  
20: 733.31 cm\*\*<sup>-1</sup>  
21: 855.26 cm\*\*<sup>-1</sup>  
22: 875.19 cm\*\*<sup>-1</sup>  
23: 930.66 cm\*\*<sup>-1</sup>  
24: 1015.19 cm\*\*<sup>-1</sup>  
25: 1037.84 cm\*\*<sup>-1</sup>  
26: 1046.21 cm\*\*<sup>-1</sup>  
27: 1130.46 cm\*\*<sup>-1</sup>  
28: 1157.09 cm\*\*<sup>-1</sup>  
29: 1231.55 cm\*\*<sup>-1</sup>  
30: 1280.91 cm\*\*<sup>-1</sup>  
31: 1298.31 cm\*\*<sup>-1</sup>  
32: 1396.04 cm\*\*<sup>-1</sup>  
33: 1441.22 cm\*\*<sup>-1</sup>  
34: 1513.39 cm\*\*<sup>-1</sup>  
35: 1634.22 cm\*\*<sup>-1</sup>  
36: 1665.57 cm\*\*<sup>-1</sup>  
37: 1815.79 cm\*\*<sup>-1</sup>  
38: 2972.22 cm\*\*<sup>-1</sup>  
39: 3213.17 cm\*\*<sup>-1</sup>  
40: 3227.16 cm\*\*<sup>-1</sup>  
41: 3239.72 cm\*\*<sup>-1</sup>

### Min2(S<sub>i</sub>)

0: 0.00 cm\*\*<sup>-1</sup>  
1: 0.00 cm\*\*<sup>-1</sup>  
2: 0.00 cm\*\*<sup>-1</sup>  
3: 0.00 cm\*\*<sup>-1</sup>  
4: 0.00 cm\*\*<sup>-1</sup>  
5: 0.00 cm\*\*<sup>-1</sup>  
6: 41.30 cm\*\*<sup>-1</sup>  
7: 65.14 cm\*\*<sup>-1</sup>  
8: 78.34 cm\*\*<sup>-1</sup>  
9: 102.97 cm\*\*<sup>-1</sup>  
10: 132.05 cm\*\*<sup>-1</sup>  
11: 175.59 cm\*\*<sup>-1</sup>  
12: 220.25 cm\*\*<sup>-1</sup>  
13: 279.31 cm\*\*<sup>-1</sup>  
14: 293.50 cm\*\*<sup>-1</sup>  
15: 416.63 cm\*\*<sup>-1</sup>  
16: 489.03 cm\*\*<sup>-1</sup>  
17: 506.14 cm\*\*<sup>-1</sup>  
18: 631.69 cm\*\*<sup>-1</sup>

19: 673.89 cm\*\*-1  
20: 716.54 cm\*\*-1  
21: 826.19 cm\*\*-1  
22: 850.80 cm\*\*-1  
23: 924.84 cm\*\*-1  
24: 997.31 cm\*\*-1  
25: 1006.44 cm\*\*-1  
26: 1048.52 cm\*\*-1  
27: 1072.84 cm\*\*-1  
28: 1145.23 cm\*\*-1  
29: 1213.74 cm\*\*-1  
30: 1288.00 cm\*\*-1  
31: 1321.51 cm\*\*-1  
32: 1396.26 cm\*\*-1  
33: 1435.97 cm\*\*-1  
34: 1489.09 cm\*\*-1  
35: 1614.80 cm\*\*-1  
36: 1658.06 cm\*\*-1  
37: 1810.36 cm\*\*-1  
38: 2967.63 cm\*\*-1  
39: 3174.18 cm\*\*-1  
40: 3207.09 cm\*\*-1  
41: 3231.57 cm\*\*-1

### Min3(T<sub>i</sub>)

0: 0.00 cm\*\*-1  
1: 0.00 cm\*\*-1  
2: 0.00 cm\*\*-1  
3: 0.00 cm\*\*-1  
4: 0.00 cm\*\*-1  
5: 0.00 cm\*\*-1  
6: 0.00 cm\*\*-1  
7: 36.53 cm\*\*-1  
8: 68.19 cm\*\*-1  
9: 73.05 cm\*\*-1  
10: 130.12 cm\*\*-1  
11: 147.34 cm\*\*-1  
12: 222.95 cm\*\*-1  
13: 276.40 cm\*\*-1  
14: 282.16 cm\*\*-1  
15: 424.69 cm\*\*-1  
16: 501.79 cm\*\*-1  
17: 509.83 cm\*\*-1  
18: 630.43 cm\*\*-1  
19: 682.15 cm\*\*-1  
20: 707.71 cm\*\*-1  
21: 835.45 cm\*\*-1  
22: 857.64 cm\*\*-1  
23: 908.49 cm\*\*-1  
24: 1009.08 cm\*\*-1  
25: 1011.84 cm\*\*-1  
26: 1049.29 cm\*\*-1

27: 1102.38 cm\*\*<sup>-1</sup>  
28: 1151.17 cm\*\*<sup>-1</sup>  
29: 1204.03 cm\*\*<sup>-1</sup>  
30: 1267.29 cm\*\*<sup>-1</sup>  
31: 1307.73 cm\*\*<sup>-1</sup>  
32: 1398.99 cm\*\*<sup>-1</sup>  
33: 1431.80 cm\*\*<sup>-1</sup>  
34: 1497.76 cm\*\*<sup>-1</sup>  
35: 1598.97 cm\*\*<sup>-1</sup>  
36: 1664.28 cm\*\*<sup>-1</sup>  
37: 1815.01 cm\*\*<sup>-1</sup>  
38: 2975.77 cm\*\*<sup>-1</sup>  
39: 3202.73 cm\*\*<sup>-1</sup>  
40: 3220.32 cm\*\*<sup>-1</sup>  
41: 3235.69 cm\*\*<sup>-1</sup>

**P(S<sub>0</sub>)**

0: 0.00 cm\*\*<sup>-1</sup>  
1: 0.00 cm\*\*<sup>-1</sup>  
2: 0.00 cm\*\*<sup>-1</sup>  
3: 0.00 cm\*\*<sup>-1</sup>  
4: 0.00 cm\*\*<sup>-1</sup>  
5: 0.00 cm\*\*<sup>-1</sup>  
6: 0.00 cm\*\*<sup>-1</sup>  
7: 0.00 cm\*\*<sup>-1</sup>  
8: 23.27 cm\*\*<sup>-1</sup>  
9: 38.58 cm\*\*<sup>-1</sup>  
10: 44.11 cm\*\*<sup>-1</sup>  
11: 104.95 cm\*\*<sup>-1</sup>  
12: 231.09 cm\*\*<sup>-1</sup>  
13: 234.11 cm\*\*<sup>-1</sup>  
14: 250.20 cm\*\*<sup>-1</sup>  
15: 380.59 cm\*\*<sup>-1</sup>  
16: 406.33 cm\*\*<sup>-1</sup>  
17: 473.92 cm\*\*<sup>-1</sup>  
18: 485.46 cm\*\*<sup>-1</sup>  
19: 643.06 cm\*\*<sup>-1</sup>  
20: 646.38 cm\*\*<sup>-1</sup>  
21: 756.01 cm\*\*<sup>-1</sup>  
22: 853.06 cm\*\*<sup>-1</sup>  
23: 928.11 cm\*\*<sup>-1</sup>  
24: 939.74 cm\*\*<sup>-1</sup>  
25: 1005.78 cm\*\*<sup>-1</sup>  
26: 1052.96 cm\*\*<sup>-1</sup>  
27: 1072.51 cm\*\*<sup>-1</sup>  
28: 1133.53 cm\*\*<sup>-1</sup>  
29: 1214.30 cm\*\*<sup>-1</sup>  
30: 1273.94 cm\*\*<sup>-1</sup>  
31: 1333.50 cm\*\*<sup>-1</sup>  
32: 1393.38 cm\*\*<sup>-1</sup>  
33: 1445.45 cm\*\*<sup>-1</sup>  
34: 1497.18 cm\*\*<sup>-1</sup>  
35: 1541.13 cm\*\*<sup>-1</sup>  
36: 1809.02 cm\*\*<sup>-1</sup>  
37: 2069.81 cm\*\*<sup>-1</sup>

38: 2968.69 cm<sup>\*\*</sup>-1  
39: 3221.65 cm<sup>\*\*</sup>-1  
40: 3222.86 cm<sup>\*\*</sup>-1  
41: 3247.41 cm<sup>\*\*</sup>-1

**MECI-2(S<sub>0</sub>/S<sub>1</sub>)**

0: 0.00 cm<sup>\*\*</sup>-1  
1: 0.00 cm<sup>\*\*</sup>-1  
2: 0.00 cm<sup>\*\*</sup>-1  
3: 0.00 cm<sup>\*\*</sup>-1  
4: 0.00 cm<sup>\*\*</sup>-1  
5: 0.00 cm<sup>\*\*</sup>-1  
6: 0.00 cm<sup>\*\*</sup>-1  
7: 52.94 cm<sup>\*\*</sup>-1  
8: 68.64 cm<sup>\*\*</sup>-1  
9: 73.75 cm<sup>\*\*</sup>-1  
10: 141.23 cm<sup>\*\*</sup>-1  
11: 159.76 cm<sup>\*\*</sup>-1  
12: 221.55 cm<sup>\*\*</sup>-1  
13: 267.48 cm<sup>\*\*</sup>-1  
14: 381.03 cm<sup>\*\*</sup>-1  
15: 409.82 cm<sup>\*\*</sup>-1  
16: 421.89 cm<sup>\*\*</sup>-1  
17: 499.52 cm<sup>\*\*</sup>-1  
18: 548.98 cm<sup>\*\*</sup>-1  
19: 666.07 cm<sup>\*\*</sup>-1  
20: 687.04 cm<sup>\*\*</sup>-1  
21: 810.28 cm<sup>\*\*</sup>-1  
22: 854.28 cm<sup>\*\*</sup>-1  
23: 914.59 cm<sup>\*\*</sup>-1  
24: 960.55 cm<sup>\*\*</sup>-1  
25: 1002.31 cm<sup>\*\*</sup>-1  
26: 1009.86 cm<sup>\*\*</sup>-1  
27: 1049.55 cm<sup>\*\*</sup>-1  
28: 1145.92 cm<sup>\*\*</sup>-1  
29: 1202.39 cm<sup>\*\*</sup>-1  
30: 1276.90 cm<sup>\*\*</sup>-1  
31: 1338.75 cm<sup>\*\*</sup>-1  
32: 1386.89 cm<sup>\*\*</sup>-1  
33: 1431.65 cm<sup>\*\*</sup>-1  
34: 1494.81 cm<sup>\*\*</sup>-1  
35: 1602.95 cm<sup>\*\*</sup>-1  
36: 1695.07 cm<sup>\*\*</sup>-1  
37: 1809.68 cm<sup>\*\*</sup>-1  
38: 2971.34 cm<sup>\*\*</sup>-1  
39: 3189.64 cm<sup>\*\*</sup>-1  
40: 3203.96 cm<sup>\*\*</sup>-1  
41: 3229.01 cm<sup>\*\*</sup>-1

**Min1(S<sub>0</sub>)**

**1,2,4-di-iodo cyano benzene**

0: 0.00 cm<sup>\*\*</sup>-1  
1: 0.00 cm<sup>\*\*</sup>-1  
2: 0.00 cm<sup>\*\*</sup>-1  
3: 0.00 cm<sup>\*\*</sup>-1

4: 0.00 cm\*\*-1  
5: 0.00 cm\*\*-1  
6: 67.55 cm\*\*-1  
7: 100.41 cm\*\*-1  
8: 113.59 cm\*\*-1  
9: 131.19 cm\*\*-1  
10: 218.14 cm\*\*-1  
11: 240.33 cm\*\*-1  
12: 290.74 cm\*\*-1  
13: 337.17 cm\*\*-1  
14: 434.63 cm\*\*-1  
15: 468.31 cm\*\*-1  
16: 540.24 cm\*\*-1  
17: 592.87 cm\*\*-1  
18: 617.43 cm\*\*-1  
19: 688.36 cm\*\*-1  
20: 736.54 cm\*\*-1  
21: 844.53 cm\*\*-1  
22: 862.01 cm\*\*-1  
23: 942.87 cm\*\*-1  
24: 1009.65 cm\*\*-1  
25: 1041.06 cm\*\*-1  
26: 1142.30 cm\*\*-1  
27: 1179.05 cm\*\*-1  
28: 1232.13 cm\*\*-1  
29: 1266.46 cm\*\*-1  
30: 1305.61 cm\*\*-1  
31: 1420.29 cm\*\*-1  
32: 1512.96 cm\*\*-1  
33: 1620.50 cm\*\*-1  
34: 1666.55 cm\*\*-1  
35: 2403.50 cm\*\*-1  
36: 3228.94 cm\*\*-1  
37: 3235.49 cm\*\*-1  
38: 3242.82 cm\*\*-1

**Min2(S<sub>i</sub>)**

0: 0.00 cm\*\*-1  
1: 0.00 cm\*\*-1  
2: 0.00 cm\*\*-1  
3: 0.00 cm\*\*-1  
4: 0.00 cm\*\*-1  
5: 0.00 cm\*\*-1  
6: 49.03 cm\*\*-1  
7: 72.19 cm\*\*-1  
8: 79.21 cm\*\*-1  
9: 100.69 cm\*\*-1  
10: 156.14 cm\*\*-1  
11: 215.48 cm\*\*-1  
12: 228.39 cm\*\*-1  
13: 273.26 cm\*\*-1  
14: 403.71 cm\*\*-1  
15: 448.83 cm\*\*-1  
16: 511.65 cm\*\*-1  
17: 582.07 cm\*\*-1  
18: 589.27 cm\*\*-1

19: 651.04 cm\*\*<sup>-1</sup>  
20: 725.33 cm\*\*<sup>-1</sup>  
21: 766.79 cm\*\*<sup>-1</sup>  
22: 850.53 cm\*\*<sup>-1</sup>  
23: 932.05 cm\*\*<sup>-1</sup>  
24: 994.47 cm\*\*<sup>-1</sup>  
25: 999.44 cm\*\*<sup>-1</sup>  
26: 1078.61 cm\*\*<sup>-1</sup>  
27: 1159.05 cm\*\*<sup>-1</sup>  
28: 1211.45 cm\*\*<sup>-1</sup>  
29: 1288.46 cm\*\*<sup>-1</sup>  
30: 1299.34 cm\*\*<sup>-1</sup>  
31: 1418.38 cm\*\*<sup>-1</sup>  
32: 1486.49 cm\*\*<sup>-1</sup>  
33: 1606.63 cm\*\*<sup>-1</sup>  
34: 1660.33 cm\*\*<sup>-1</sup>  
35: 2397.69 cm\*\*<sup>-1</sup>  
36: 3201.29 cm\*\*<sup>-1</sup>  
37: 3209.71 cm\*\*<sup>-1</sup>  
38: 3237.18 cm\*\*<sup>-1</sup>

### Min3(T<sub>1</sub>)

0: 0.00 cm\*\*<sup>-1</sup>  
1: 0.00 cm\*\*<sup>-1</sup>  
2: 0.00 cm\*\*<sup>-1</sup>  
3: 0.00 cm\*\*<sup>-1</sup>  
4: 0.00 cm\*\*<sup>-1</sup>  
5: 0.00 cm\*\*<sup>-1</sup>  
6: 31.31 cm\*\*<sup>-1</sup>  
7: 38.42 cm\*\*<sup>-1</sup>  
8: 65.39 cm\*\*<sup>-1</sup>  
9: 75.19 cm\*\*<sup>-1</sup>  
10: 130.58 cm\*\*<sup>-1</sup>  
11: 219.01 cm\*\*<sup>-1</sup>  
12: 233.08 cm\*\*<sup>-1</sup>  
13: 239.39 cm\*\*<sup>-1</sup>  
14: 414.73 cm\*\*<sup>-1</sup>  
15: 448.25 cm\*\*<sup>-1</sup>  
16: 534.09 cm\*\*<sup>-1</sup>  
17: 580.13 cm\*\*<sup>-1</sup>  
18: 594.09 cm\*\*<sup>-1</sup>  
19: 647.18 cm\*\*<sup>-1</sup>  
20: 715.60 cm\*\*<sup>-1</sup>  
21: 777.13 cm\*\*<sup>-1</sup>  
22: 858.39 cm\*\*<sup>-1</sup>  
23: 921.67 cm\*\*<sup>-1</sup>  
24: 1002.61 cm\*\*<sup>-1</sup>  
25: 1011.10 cm\*\*<sup>-1</sup>  
26: 1106.67 cm\*\*<sup>-1</sup>  
27: 1164.72 cm\*\*<sup>-1</sup>  
28: 1207.40 cm\*\*<sup>-1</sup>  
29: 1263.79 cm\*\*<sup>-1</sup>  
30: 1291.86 cm\*\*<sup>-1</sup>  
31: 1414.78 cm\*\*<sup>-1</sup>  
32: 1498.12 cm\*\*<sup>-1</sup>

33: 1588.11 cm<sup>\*\*</sup>-1  
34: 1667.37 cm<sup>\*\*</sup>-1  
35: 2401.83 cm<sup>\*\*</sup>-1  
36: 3222.91 cm<sup>\*\*</sup>-1  
37: 3226.97 cm<sup>\*\*</sup>-1  
38: 3241.21 cm<sup>\*\*</sup>-1

**P(S<sub>0</sub>)**

0: 0.00 cm<sup>\*\*</sup>-1  
1: 0.00 cm<sup>\*\*</sup>-1  
2: 0.00 cm<sup>\*\*</sup>-1  
3: 0.00 cm<sup>\*\*</sup>-1  
4: 0.00 cm<sup>\*\*</sup>-1  
5: 0.00 cm<sup>\*\*</sup>-1  
6: 0.00 cm<sup>\*\*</sup>-1  
7: 13.13 cm<sup>\*\*</sup>-1  
8: 22.23 cm<sup>\*\*</sup>-1  
9: 40.04 cm<sup>\*\*</sup>-1  
10: 46.95 cm<sup>\*\*</sup>-1  
11: 164.75 cm<sup>\*\*</sup>-1  
12: 174.88 cm<sup>\*\*</sup>-1  
13: 231.37 cm<sup>\*\*</sup>-1  
14: 389.84 cm<sup>\*\*</sup>-1  
15: 407.12 cm<sup>\*\*</sup>-1  
16: 449.67 cm<sup>\*\*</sup>-1  
17: 520.10 cm<sup>\*\*</sup>-1  
18: 539.23 cm<sup>\*\*</sup>-1  
19: 589.56 cm<sup>\*\*</sup>-1  
20: 669.50 cm<sup>\*\*</sup>-1  
21: 685.14 cm<sup>\*\*</sup>-1  
22: 851.87 cm<sup>\*\*</sup>-1  
23: 931.51 cm<sup>\*\*</sup>-1  
24: 935.81 cm<sup>\*\*</sup>-1  
25: 996.74 cm<sup>\*\*</sup>-1  
26: 1073.41 cm<sup>\*\*</sup>-1  
27: 1149.91 cm<sup>\*\*</sup>-1  
28: 1203.30 cm<sup>\*\*</sup>-1  
29: 1270.71 cm<sup>\*\*</sup>-1  
30: 1317.19 cm<sup>\*\*</sup>-1  
31: 1405.12 cm<sup>\*\*</sup>-1  
32: 1485.67 cm<sup>\*\*</sup>-1  
33: 1546.14 cm<sup>\*\*</sup>-1  
34: 2064.51 cm<sup>\*\*</sup>-1  
35: 2398.70 cm<sup>\*\*</sup>-1  
36: 3223.99 cm<sup>\*\*</sup>-1  
37: 3241.52 cm<sup>\*\*</sup>-1  
38: 3252.58 cm<sup>\*\*</sup>-1

**MECI-2(S<sub>i</sub>/S<sub>0</sub>)**

0: 0.00 cm<sup>\*\*</sup>-1  
1: 0.00 cm<sup>\*\*</sup>-1  
2: 0.00 cm<sup>\*\*</sup>-1  
3: 0.00 cm<sup>\*\*</sup>-1  
4: 0.00 cm<sup>\*\*</sup>-1  
5: 0.00 cm<sup>\*\*</sup>-1



6: 0.00 cm\*\*<sup>-1</sup>  
7: 13.13 cm\*\*<sup>-1</sup>  
8: 22.23 cm\*\*<sup>-1</sup>  
9: 40.04 cm\*\*<sup>-1</sup>  
10: 46.95 cm\*\*<sup>-1</sup>  
11: 164.75 cm\*\*<sup>-1</sup>  
12: 174.88 cm\*\*<sup>-1</sup>  
13: 231.37 cm\*\*<sup>-1</sup>  
14: 389.84 cm\*\*<sup>-1</sup>  
15: 407.12 cm\*\*<sup>-1</sup>  
16: 449.67 cm\*\*<sup>-1</sup>  
17: 520.10 cm\*\*<sup>-1</sup>  
18: 539.23 cm\*\*<sup>-1</sup>  
19: 589.56 cm\*\*<sup>-1</sup>  
20: 669.50 cm\*\*<sup>-1</sup>  
21: 685.14 cm\*\*<sup>-1</sup>  
22: 851.87 cm\*\*<sup>-1</sup>  
23: 931.51 cm\*\*<sup>-1</sup>  
24: 935.81 cm\*\*<sup>-1</sup>  
25: 996.74 cm\*\*<sup>-1</sup>  
26: 1073.41 cm\*\*<sup>-1</sup>  
27: 1149.91 cm\*\*<sup>-1</sup>  
28: 1203.30 cm\*\*<sup>-1</sup>  
29: 1270.71 cm\*\*<sup>-1</sup>  
30: 1317.19 cm\*\*<sup>-1</sup>  
31: 1405.12 cm\*\*<sup>-1</sup>  
32: 1485.67 cm\*\*<sup>-1</sup>  
33: 1546.14 cm\*\*<sup>-1</sup>  
34: 2064.51 cm\*\*<sup>-1</sup>  
35: 2398.70 cm\*\*<sup>-1</sup>  
36: 3223.99 cm\*\*<sup>-1</sup>  
37: 3241.52 cm\*\*<sup>-1</sup>  
38: 3252.58 cm\*\*<sup>-1</sup>

**Min1(S<sub>0</sub>)**

**1,2,4-di-iodo nitro benzene**

0: 0.00 cm\*\*<sup>-1</sup>  
1: 0.00 cm\*\*<sup>-1</sup>  
2: 0.00 cm\*\*<sup>-1</sup>  
3: 0.00 cm\*\*<sup>-1</sup>  
4: 0.00 cm\*\*<sup>-1</sup>  
5: 0.00 cm\*\*<sup>-1</sup>  
6: 0.00 cm\*\*<sup>-1</sup>  
7: 66.12 cm\*\*<sup>-1</sup>  
8: 100.09 cm\*\*<sup>-1</sup>  
9: 130.60 cm\*\*<sup>-1</sup>  
10: 138.26 cm\*\*<sup>-1</sup>  
11: 219.24 cm\*\*<sup>-1</sup>  
12: 271.84 cm\*\*<sup>-1</sup>  
13: 275.48 cm\*\*<sup>-1</sup>  
14: 367.14 cm\*\*<sup>-1</sup>  
15: 440.77 cm\*\*<sup>-1</sup>  
16: 488.91 cm\*\*<sup>-1</sup>  
17: 523.21 cm\*\*<sup>-1</sup>  
18: 555.14 cm\*\*<sup>-1</sup>  
19: 671.90 cm\*\*<sup>-1</sup>

20: 717.25 cm\*\*<sup>-1</sup>  
21: 766.84 cm\*\*<sup>-1</sup>  
22: 778.34 cm\*\*<sup>-1</sup>  
23: 865.82 cm\*\*<sup>-1</sup>  
24: 908.70 cm\*\*<sup>-1</sup>  
25: 957.33 cm\*\*<sup>-1</sup>  
26: 1010.17 cm\*\*<sup>-1</sup>  
27: 1039.56 cm\*\*<sup>-1</sup>  
28: 1127.62 cm\*\*<sup>-1</sup>  
29: 1156.57 cm\*\*<sup>-1</sup>  
30: 1163.86 cm\*\*<sup>-1</sup>  
31: 1284.71 cm\*\*<sup>-1</sup>  
32: 1285.71 cm\*\*<sup>-1</sup>  
33: 1419.30 cm\*\*<sup>-1</sup>  
34: 1464.28 cm\*\*<sup>-1</sup>  
35: 1501.84 cm\*\*<sup>-1</sup>  
36: 1637.67 cm\*\*<sup>-1</sup>  
37: 1653.81 cm\*\*<sup>-1</sup>  
38: 1694.74 cm\*\*<sup>-1</sup>  
39: 3237.75 cm\*\*<sup>-1</sup>  
40: 3259.02 cm\*\*<sup>-1</sup>  
41: 3264.33 cm\*\*<sup>-1</sup>

#### Min2(S<sub>i</sub>)

0: 0.00 cm\*\*<sup>-1</sup>  
1: 0.00 cm\*\*<sup>-1</sup>  
2: 0.00 cm\*\*<sup>-1</sup>  
3: 0.00 cm\*\*<sup>-1</sup>  
4: 0.00 cm\*\*<sup>-1</sup>  
5: 0.00 cm\*\*<sup>-1</sup>  
6: 0.00 cm\*\*<sup>-1</sup>  
7: 66.12 cm\*\*<sup>-1</sup>  
8: 100.09 cm\*\*<sup>-1</sup>  
9: 130.60 cm\*\*<sup>-1</sup>  
10: 138.26 cm\*\*<sup>-1</sup>  
11: 219.24 cm\*\*<sup>-1</sup>  
12: 271.84 cm\*\*<sup>-1</sup>  
13: 275.48 cm\*\*<sup>-1</sup>  
14: 367.14 cm\*\*<sup>-1</sup>  
15: 440.77 cm\*\*<sup>-1</sup>  
16: 488.91 cm\*\*<sup>-1</sup>  
17: 523.21 cm\*\*<sup>-1</sup>  
18: 555.14 cm\*\*<sup>-1</sup>  
19: 671.90 cm\*\*<sup>-1</sup>  
20: 717.25 cm\*\*<sup>-1</sup>  
21: 766.84 cm\*\*<sup>-1</sup>  
22: 778.34 cm\*\*<sup>-1</sup>  
23: 865.82 cm\*\*<sup>-1</sup>  
24: 908.70 cm\*\*<sup>-1</sup>  
25: 957.33 cm\*\*<sup>-1</sup>  
26: 1010.17 cm\*\*<sup>-1</sup>  
27: 1039.56 cm\*\*<sup>-1</sup>  
28: 1127.62 cm\*\*<sup>-1</sup>  
29: 1156.57 cm\*\*<sup>-1</sup>  
30: 1163.86 cm\*\*<sup>-1</sup>

31: 1284.71 cm\*\*-1  
32: 1285.71 cm\*\*-1  
33: 1419.30 cm\*\*-1  
34: 1464.28 cm\*\*-1  
35: 1501.84 cm\*\*-1  
36: 1637.67 cm\*\*-1  
37: 1653.81 cm\*\*-1  
38: 1694.74 cm\*\*-1  
39: 3237.75 cm\*\*-1  
40: 3259.02 cm\*\*-1  
41: 3264.33 cm\*\*-1

### Min3(T<sub>1</sub>)

0: 0.00 cm\*\*-1  
1: 0.00 cm\*\*-1  
2: 0.00 cm\*\*-1  
3: 0.00 cm\*\*-1  
4: 0.00 cm\*\*-1  
5: 0.00 cm\*\*-1  
6: 25.95 cm\*\*-1  
7: 37.47 cm\*\*-1  
8: 56.58 cm\*\*-1  
9: 65.31 cm\*\*-1  
10: 78.34 cm\*\*-1  
11: 151.72 cm\*\*-1  
12: 215.33 cm\*\*-1  
13: 258.49 cm\*\*-1  
14: 299.18 cm\*\*-1  
15: 423.81 cm\*\*-1  
16: 477.30 cm\*\*-1  
17: 497.76 cm\*\*-1  
18: 540.10 cm\*\*-1  
19: 628.83 cm\*\*-1  
20: 694.33 cm\*\*-1  
21: 721.83 cm\*\*-1  
22: 777.21 cm\*\*-1  
23: 866.27 cm\*\*-1  
24: 887.41 cm\*\*-1  
25: 937.37 cm\*\*-1  
26: 1006.63 cm\*\*-1  
27: 1008.75 cm\*\*-1  
28: 1102.62 cm\*\*-1  
29: 1139.47 cm\*\*-1  
30: 1149.79 cm\*\*-1  
31: 1257.43 cm\*\*-1  
32: 1312.65 cm\*\*-1  
33: 1410.56 cm\*\*-1  
34: 1462.91 cm\*\*-1  
35: 1483.36 cm\*\*-1  
36: 1610.14 cm\*\*-1  
37: 1659.45 cm\*\*-1  
38: 1689.65 cm\*\*-1  
39: 3224.99 cm\*\*-1  
40: 3246.55 cm\*\*-1  
41: 3263.54 cm\*\*-1

**P(S<sub>0</sub>)**

0: 0.00 cm\*\*<sup>-1</sup>  
1: 0.00 cm\*\*<sup>-1</sup>  
2: 0.00 cm\*\*<sup>-1</sup>  
3: 0.00 cm\*\*<sup>-1</sup>  
4: 0.00 cm\*\*<sup>-1</sup>  
5: 0.00 cm\*\*<sup>-1</sup>  
6: 0.00 cm\*\*<sup>-1</sup>  
7: 0.00 cm\*\*<sup>-1</sup>  
8: 28.27 cm\*\*<sup>-1</sup>  
9: 36.91 cm\*\*<sup>-1</sup>  
10: 38.73 cm\*\*<sup>-1</sup>  
11: 59.48 cm\*\*<sup>-1</sup>  
12: 193.53 cm\*\*<sup>-1</sup>  
13: 230.41 cm\*\*<sup>-1</sup>  
14: 276.86 cm\*\*<sup>-1</sup>  
15: 384.54 cm\*\*<sup>-1</sup>  
16: 391.65 cm\*\*<sup>-1</sup>  
17: 463.71 cm\*\*<sup>-1</sup>  
18: 473.11 cm\*\*<sup>-1</sup>  
19: 534.98 cm\*\*<sup>-1</sup>  
20: 620.64 cm\*\*<sup>-1</sup>  
21: 644.82 cm\*\*<sup>-1</sup>  
22: 774.06 cm\*\*<sup>-1</sup>  
23: 845.71 cm\*\*<sup>-1</sup>  
24: 869.03 cm\*\*<sup>-1</sup>  
25: 941.18 cm\*\*<sup>-1</sup>  
26: 945.90 cm\*\*<sup>-1</sup>  
27: 996.63 cm\*\*<sup>-1</sup>  
28: 1070.42 cm\*\*<sup>-1</sup>  
29: 1125.26 cm\*\*<sup>-1</sup>  
30: 1152.13 cm\*\*<sup>-1</sup>  
31: 1262.58 cm\*\*<sup>-1</sup>  
32: 1334.83 cm\*\*<sup>-1</sup>  
33: 1420.92 cm\*\*<sup>-1</sup>  
34: 1463.52 cm\*\*<sup>-1</sup>  
35: 1502.50 cm\*\*<sup>-1</sup>  
36: 1533.62 cm\*\*<sup>-1</sup>  
37: 1668.92 cm\*\*<sup>-1</sup>  
38: 2068.32 cm\*\*<sup>-1</sup>  
39: 3247.93 cm\*\*<sup>-1</sup>  
40: 3259.74 cm\*\*<sup>-1</sup>  
41: 3266.09 cm\*\*<sup>-1</sup>

**MECI-2(S<sub>1</sub>/S<sub>0</sub>)**

0: 0.00 cm\*\*<sup>-1</sup>  
1: 0.00 cm\*\*<sup>-1</sup>  
2: 0.00 cm\*\*<sup>-1</sup>  
3: 0.00 cm\*\*<sup>-1</sup>  
4: 0.00 cm\*\*<sup>-1</sup>  
5: 0.00 cm\*\*<sup>-1</sup>  
6: 0.00 cm\*\*<sup>-1</sup>  
7: 32.50 cm\*\*<sup>-1</sup>

8: 57.12 cm<sup>\*\*</sup>-1  
9: 92.75 cm<sup>\*\*</sup>-1  
10: 93.25 cm<sup>\*\*</sup>-1  
11: 162.74 cm<sup>\*\*</sup>-1  
12: 241.71 cm<sup>\*\*</sup>-1  
13: 244.10 cm<sup>\*\*</sup>-1  
14: 362.81 cm<sup>\*\*</sup>-1  
15: 416.46 cm<sup>\*\*</sup>-1  
16: 445.66 cm<sup>\*\*</sup>-1  
17: 489.13 cm<sup>\*\*</sup>-1  
18: 543.92 cm<sup>\*\*</sup>-1  
19: 599.52 cm<sup>\*\*</sup>-1  
20: 674.80 cm<sup>\*\*</sup>-1  
21: 677.97 cm<sup>\*\*</sup>-1  
22: 778.34 cm<sup>\*\*</sup>-1  
23: 869.35 cm<sup>\*\*</sup>-1  
24: 878.60 cm<sup>\*\*</sup>-1  
25: 940.27 cm<sup>\*\*</sup>-1  
26: 971.17 cm<sup>\*\*</sup>-1  
27: 1010.76 cm<sup>\*\*</sup>-1  
28: 1042.65 cm<sup>\*\*</sup>-1  
29: 1129.84 cm<sup>\*\*</sup>-1  
30: 1165.29 cm<sup>\*\*</sup>-1  
31: 1267.57 cm<sup>\*\*</sup>-1  
32: 1355.62 cm<sup>\*\*</sup>-1  
33: 1420.70 cm<sup>\*\*</sup>-1  
34: 1463.29 cm<sup>\*\*</sup>-1  
35: 1474.34 cm<sup>\*\*</sup>-1  
36: 1626.03 cm<sup>\*\*</sup>-1  
37: 1665.33 cm<sup>\*\*</sup>-1  
38: 1716.93 cm<sup>\*\*</sup>-1  
39: 3181.03 cm<sup>\*\*</sup>-1  
40: 3249.49 cm<sup>\*\*</sup>-1  
41: 3261.75 cm<sup>\*\*</sup>-1

**Min1(S<sub>0</sub>)**

**1,2,4-di-iodo methoxy benzene**

0: 0.00 cm<sup>\*\*</sup>-1  
1: 0.00 cm<sup>\*\*</sup>-1  
2: 0.00 cm<sup>\*\*</sup>-1  
3: 0.00 cm<sup>\*\*</sup>-1  
4: 0.00 cm<sup>\*\*</sup>-1  
5: 0.00 cm<sup>\*\*</sup>-1  
6: 0.00 cm<sup>\*\*</sup>-1  
7: 32.50 cm<sup>\*\*</sup>-1  
8: 57.12 cm<sup>\*\*</sup>-1  
9: 92.75 cm<sup>\*\*</sup>-1  
10: 93.25 cm<sup>\*\*</sup>-1  
11: 162.74 cm<sup>\*\*</sup>-1  
12: 241.71 cm<sup>\*\*</sup>-1  
13: 244.10 cm<sup>\*\*</sup>-1  
14: 362.81 cm<sup>\*\*</sup>-1  
15: 416.46 cm<sup>\*\*</sup>-1  
16: 445.66 cm<sup>\*\*</sup>-1  
17: 489.13 cm<sup>\*\*</sup>-1  
18: 543.92 cm<sup>\*\*</sup>-1

19: 599.52 cm\*\*<sup>-1</sup>  
20: 674.80 cm\*\*<sup>-1</sup>  
21: 677.97 cm\*\*<sup>-1</sup>  
22: 778.34 cm\*\*<sup>-1</sup>  
23: 869.35 cm\*\*<sup>-1</sup>  
24: 878.60 cm\*\*<sup>-1</sup>  
25: 940.27 cm\*\*<sup>-1</sup>  
26: 971.17 cm\*\*<sup>-1</sup>  
27: 1010.76 cm\*\*<sup>-1</sup>  
28: 1042.65 cm\*\*<sup>-1</sup>  
29: 1129.84 cm\*\*<sup>-1</sup>  
30: 1165.29 cm\*\*<sup>-1</sup>  
31: 1267.57 cm\*\*<sup>-1</sup>  
32: 1355.62 cm\*\*<sup>-1</sup>  
33: 1420.70 cm\*\*<sup>-1</sup>  
34: 1463.29 cm\*\*<sup>-1</sup>  
35: 1474.34 cm\*\*<sup>-1</sup>  
36: 1626.03 cm\*\*<sup>-1</sup>  
37: 1665.33 cm\*\*<sup>-1</sup>  
38: 1716.93 cm\*\*<sup>-1</sup>  
39: 3181.03 cm\*\*<sup>-1</sup>  
40: 3249.49 cm\*\*<sup>-1</sup>  
41: 3261.75 cm\*\*<sup>-1</sup>

**Min2(S<sub>i</sub>)**

0: 0.00 cm\*\*<sup>-1</sup>  
1: 0.00 cm\*\*<sup>-1</sup>  
2: 0.00 cm\*\*<sup>-1</sup>  
3: 0.00 cm\*\*<sup>-1</sup>  
4: 0.00 cm\*\*<sup>-1</sup>  
5: 0.00 cm\*\*<sup>-1</sup>  
6: 41.01 cm\*\*<sup>-1</sup>  
7: 71.36 cm\*\*<sup>-1</sup>  
8: 107.15 cm\*\*<sup>-1</sup>  
9: 115.00 cm\*\*<sup>-1</sup>  
10: 131.76 cm\*\*<sup>-1</sup>  
11: 161.24 cm\*\*<sup>-1</sup>  
12: 251.76 cm\*\*<sup>-1</sup>  
13: 253.09 cm\*\*<sup>-1</sup>  
14: 317.32 cm\*\*<sup>-1</sup>  
15: 335.67 cm\*\*<sup>-1</sup>  
16: 419.62 cm\*\*<sup>-1</sup>  
17: 464.93 cm\*\*<sup>-1</sup>  
18: 569.59 cm\*\*<sup>-1</sup>  
19: 570.44 cm\*\*<sup>-1</sup>  
20: 646.60 cm\*\*<sup>-1</sup>  
21: 699.15 cm\*\*<sup>-1</sup>  
22: 799.60 cm\*\*<sup>-1</sup>  
23: 836.33 cm\*\*<sup>-1</sup>  
24: 865.22 cm\*\*<sup>-1</sup>  
25: 979.01 cm\*\*<sup>-1</sup>  
26: 984.19 cm\*\*<sup>-1</sup>  
27: 1077.56 cm\*\*<sup>-1</sup>  
28: 1092.89 cm\*\*<sup>-1</sup>  
29: 1133.94 cm\*\*<sup>-1</sup>

30: 1188.63 cm\*\*-1  
31: 1216.97 cm\*\*-1  
32: 1266.62 cm\*\*-1  
33: 1288.62 cm\*\*-1  
34: 1342.82 cm\*\*-1  
35: 1419.70 cm\*\*-1  
36: 1474.71 cm\*\*-1  
37: 1499.43 cm\*\*-1  
38: 1505.28 cm\*\*-1  
39: 1511.55 cm\*\*-1  
40: 1627.28 cm\*\*-1  
41: 1670.17 cm\*\*-1  
42: 3045.23 cm\*\*-1  
43: 3115.43 cm\*\*-1  
44: 3184.27 cm\*\*-1  
45: 3190.09 cm\*\*-1  
46: 3219.65 cm\*\*-1  
47: 3233.05 cm\*\*-1

**Min3(T<sub>i</sub>)**

0: 0.00 cm\*\*-1  
1: 0.00 cm\*\*-1  
2: 0.00 cm\*\*-1  
3: 0.00 cm\*\*-1  
4: 0.00 cm\*\*-1  
5: 0.00 cm\*\*-1  
6: 0.00 cm\*\*-1  
7: 32.61 cm\*\*-1  
8: 68.34 cm\*\*-1  
9: 121.26 cm\*\*-1  
10: 136.58 cm\*\*-1  
11: 144.52 cm\*\*-1  
12: 247.47 cm\*\*-1  
13: 262.65 cm\*\*-1  
14: 317.07 cm\*\*-1  
15: 336.10 cm\*\*-1  
16: 430.92 cm\*\*-1  
17: 463.22 cm\*\*-1  
18: 565.72 cm\*\*-1  
19: 570.08 cm\*\*-1  
20: 657.10 cm\*\*-1  
21: 693.78 cm\*\*-1  
22: 826.10 cm\*\*-1  
23: 837.06 cm\*\*-1  
24: 877.15 cm\*\*-1  
25: 982.61 cm\*\*-1  
26: 992.42 cm\*\*-1  
27: 1090.31 cm\*\*-1  
28: 1099.47 cm\*\*-1  
29: 1134.36 cm\*\*-1  
30: 1190.68 cm\*\*-1  
31: 1220.26 cm\*\*-1  
32: 1258.67 cm\*\*-1  
33: 1283.76 cm\*\*-1  
34: 1338.86 cm\*\*-1

35: 1414.02 cm\*\*<sup>-1</sup>  
36: 1474.56 cm\*\*<sup>-1</sup>  
37: 1500.67 cm\*\*<sup>-1</sup>  
38: 1503.85 cm\*\*<sup>-1</sup>  
39: 1512.06 cm\*\*<sup>-1</sup>  
40: 1630.26 cm\*\*<sup>-1</sup>  
41: 1654.23 cm\*\*<sup>-1</sup>  
42: 3047.86 cm\*\*<sup>-1</sup>  
43: 3119.07 cm\*\*<sup>-1</sup>  
44: 3186.20 cm\*\*<sup>-1</sup>  
45: 3216.50 cm\*\*<sup>-1</sup>  
46: 3230.92 cm\*\*<sup>-1</sup>  
47: 3244.79 cm\*\*<sup>-1</sup>

**P(S<sub>0</sub>)**

0: 0.00 cm\*\*<sup>-1</sup>  
1: 0.00 cm\*\*<sup>-1</sup>  
2: 0.00 cm\*\*<sup>-1</sup>  
3: 0.00 cm\*\*<sup>-1</sup>  
4: 0.00 cm\*\*<sup>-1</sup>  
5: 0.00 cm\*\*<sup>-1</sup>  
6: 0.00 cm\*\*<sup>-1</sup>  
7: 0.00 cm\*\*<sup>-1</sup>  
8: 21.54 cm\*\*<sup>-1</sup>  
9: 27.02 cm\*\*<sup>-1</sup>  
10: 42.42 cm\*\*<sup>-1</sup>  
11: 100.66 cm\*\*<sup>-1</sup>  
12: 223.95 cm\*\*<sup>-1</sup>  
13: 230.12 cm\*\*<sup>-1</sup>  
14: 279.87 cm\*\*<sup>-1</sup>  
15: 294.96 cm\*\*<sup>-1</sup>  
16: 378.39 cm\*\*<sup>-1</sup>  
17: 402.41 cm\*\*<sup>-1</sup>  
18: 459.43 cm\*\*<sup>-1</sup>  
19: 478.83 cm\*\*<sup>-1</sup>  
20: 595.55 cm\*\*<sup>-1</sup>  
21: 679.73 cm\*\*<sup>-1</sup>  
22: 688.86 cm\*\*<sup>-1</sup>  
23: 856.21 cm\*\*<sup>-1</sup>  
24: 864.95 cm\*\*<sup>-1</sup>  
25: 936.13 cm\*\*<sup>-1</sup>  
26: 982.70 cm\*\*<sup>-1</sup>  
27: 1071.75 cm\*\*<sup>-1</sup>  
28: 1092.14 cm\*\*<sup>-1</sup>  
29: 1135.93 cm\*\*<sup>-1</sup>  
30: 1179.72 cm\*\*<sup>-1</sup>  
31: 1209.74 cm\*\*<sup>-1</sup>  
32: 1260.09 cm\*\*<sup>-1</sup>  
33: 1278.24 cm\*\*<sup>-1</sup>  
34: 1378.40 cm\*\*<sup>-1</sup>  
35: 1415.75 cm\*\*<sup>-1</sup>  
36: 1474.86 cm\*\*<sup>-1</sup>  
37: 1489.16 cm\*\*<sup>-1</sup>  
38: 1492.68 cm\*\*<sup>-1</sup>  
39: 1501.77 cm\*\*<sup>-1</sup>



40: 1568.72 cm<sup>\*\*</sup>-1  
41: 2071.92 cm<sup>\*\*</sup>-1  
42: 3044.98 cm<sup>\*\*</sup>-1  
43: 3116.82 cm<sup>\*\*</sup>-1  
44: 3184.67 cm<sup>\*\*</sup>-1  
45: 3218.91 cm<sup>\*\*</sup>-1  
46: 3239.78 cm<sup>\*\*</sup>-1  
47: 3256.58 cm<sup>\*\*</sup>-1

**MECI-2(S<sub>1</sub>/S<sub>0</sub>)**

0: 0.00 cm<sup>\*\*</sup>-1  
1: 0.00 cm<sup>\*\*</sup>-1  
2: 0.00 cm<sup>\*\*</sup>-1  
3: 0.00 cm<sup>\*\*</sup>-1  
4: 0.00 cm<sup>\*\*</sup>-1  
5: 0.00 cm<sup>\*\*</sup>-1  
6: 0.00 cm<sup>\*\*</sup>-1  
7: 0.00 cm<sup>\*\*</sup>-1  
8: 103.12 cm<sup>\*\*</sup>-1  
9: 135.24 cm<sup>\*\*</sup>-1  
10: 140.64 cm<sup>\*\*</sup>-1  
11: 145.46 cm<sup>\*\*</sup>-1  
12: 250.95 cm<sup>\*\*</sup>-1  
13: 318.13 cm<sup>\*\*</sup>-1  
14: 323.99 cm<sup>\*\*</sup>-1  
15: 405.50 cm<sup>\*\*</sup>-1  
16: 422.63 cm<sup>\*\*</sup>-1  
17: 510.44 cm<sup>\*\*</sup>-1  
18: 531.23 cm<sup>\*\*</sup>-1  
19: 537.52 cm<sup>\*\*</sup>-1  
20: 681.98 cm<sup>\*\*</sup>-1  
21: 710.19 cm<sup>\*\*</sup>-1  
22: 764.62 cm<sup>\*\*</sup>-1  
23: 822.45 cm<sup>\*\*</sup>-1  
24: 891.17 cm<sup>\*\*</sup>-1  
25: 966.82 cm<sup>\*\*</sup>-1  
26: 979.04 cm<sup>\*\*</sup>-1  
27: 1083.82 cm<sup>\*\*</sup>-1  
28: 1131.13 cm<sup>\*\*</sup>-1  
29: 1193.48 cm<sup>\*\*</sup>-1  
30: 1216.29 cm<sup>\*\*</sup>-1  
31: 1277.87 cm<sup>\*\*</sup>-1  
32: 1282.62 cm<sup>\*\*</sup>-1  
33: 1303.42 cm<sup>\*\*</sup>-1  
34: 1401.49 cm<sup>\*\*</sup>-1  
35: 1422.94 cm<sup>\*\*</sup>-1  
36: 1492.66 cm<sup>\*\*</sup>-1  
37: 1503.35 cm<sup>\*\*</sup>-1  
38: 1511.26 cm<sup>\*\*</sup>-1  
39: 1595.54 cm<sup>\*\*</sup>-1  
40: 1616.07 cm<sup>\*\*</sup>-1  
41: 2980.65 cm<sup>\*\*</sup>-1  
42: 3045.10 cm<sup>\*\*</sup>-1  
43: 3115.56 cm<sup>\*\*</sup>-1  
44: 3187.98 cm<sup>\*\*</sup>-1

45: 3213.50 cm<sup>\*\*</sup>-1  
46: 3231.79 cm<sup>\*\*</sup>-1  
47: 3504.82 cm<sup>\*\*</sup>-1

**Min1(S<sub>0</sub>)**

**1,2,4-di-iodo hydroxy benzene**

0: 0.00 cm<sup>\*\*</sup>-1  
1: 0.00 cm<sup>\*\*</sup>-1  
2: 0.00 cm<sup>\*\*</sup>-1  
3: 0.00 cm<sup>\*\*</sup>-1  
4: 0.00 cm<sup>\*\*</sup>-1  
5: 0.00 cm<sup>\*\*</sup>-1  
6: 76.94 cm<sup>\*\*</sup>-1  
7: 100.35 cm<sup>\*\*</sup>-1  
8: 152.53 cm<sup>\*\*</sup>-1  
9: 178.32 cm<sup>\*\*</sup>-1  
10: 273.22 cm<sup>\*\*</sup>-1  
11: 310.02 cm<sup>\*\*</sup>-1  
12: 318.75 cm<sup>\*\*</sup>-1  
13: 330.86 cm<sup>\*\*</sup>-1  
14: 446.75 cm<sup>\*\*</sup>-1  
15: 459.75 cm<sup>\*\*</sup>-1  
16: 586.56 cm<sup>\*\*</sup>-1  
17: 606.25 cm<sup>\*\*</sup>-1  
18: 686.47 cm<sup>\*\*</sup>-1  
19: 716.56 cm<sup>\*\*</sup>-1  
20: 830.15 cm<sup>\*\*</sup>-1  
21: 893.90 cm<sup>\*\*</sup>-1  
22: 899.09 cm<sup>\*\*</sup>-1  
23: 970.40 cm<sup>\*\*</sup>-1  
24: 1031.76 cm<sup>\*\*</sup>-1  
25: 1132.06 cm<sup>\*\*</sup>-1  
26: 1164.37 cm<sup>\*\*</sup>-1  
27: 1199.94 cm<sup>\*\*</sup>-1  
28: 1263.96 cm<sup>\*\*</sup>-1  
29: 1301.56 cm<sup>\*\*</sup>-1  
30: 1322.13 cm<sup>\*\*</sup>-1  
31: 1462.26 cm<sup>\*\*</sup>-1  
32: 1517.79 cm<sup>\*\*</sup>-1  
33: 1647.91 cm<sup>\*\*</sup>-1  
34: 1674.16 cm<sup>\*\*</sup>-1  
35: 3207.62 cm<sup>\*\*</sup>-1  
36: 3230.34 cm<sup>\*\*</sup>-1  
37: 3235.95 cm<sup>\*\*</sup>-1  
38: 3857.79 cm<sup>\*\*</sup>-1

**Min2(S<sub>i</sub>)**

0: 0.00 cm<sup>\*\*</sup>-1  
1: 0.00 cm<sup>\*\*</sup>-1  
2: 0.00 cm<sup>\*\*</sup>-1  
3: 0.00 cm<sup>\*\*</sup>-1  
4: 0.00 cm<sup>\*\*</sup>-1  
5: 0.00 cm<sup>\*\*</sup>-1  
6: 46.85 cm<sup>\*\*</sup>-1  
7: 85.91 cm<sup>\*\*</sup>-1

8: 100.89 cm\*\*<sup>-1</sup>  
9: 108.79 cm\*\*<sup>-1</sup>  
10: 230.03 cm\*\*<sup>-1</sup>  
11: 239.78 cm\*\*<sup>-1</sup>  
12: 297.66 cm\*\*<sup>-1</sup>  
13: 344.41 cm\*\*<sup>-1</sup>  
14: 423.76 cm\*\*<sup>-1</sup>  
15: 437.51 cm\*\*<sup>-1</sup>  
16: 539.32 cm\*\*<sup>-1</sup>  
17: 577.25 cm\*\*<sup>-1</sup>  
18: 637.71 cm\*\*<sup>-1</sup>  
19: 707.22 cm\*\*<sup>-1</sup>  
20: 815.73 cm\*\*<sup>-1</sup>  
21: 823.12 cm\*\*<sup>-1</sup>  
22: 893.31 cm\*\*<sup>-1</sup>  
23: 958.19 cm\*\*<sup>-1</sup>  
24: 994.37 cm\*\*<sup>-1</sup>  
25: 1076.41 cm\*\*<sup>-1</sup>  
26: 1154.50 cm\*\*<sup>-1</sup>  
27: 1190.04 cm\*\*<sup>-1</sup>  
28: 1254.34 cm\*\*<sup>-1</sup>  
29: 1303.78 cm\*\*<sup>-1</sup>  
30: 1336.97 cm\*\*<sup>-1</sup>  
31: 1451.82 cm\*\*<sup>-1</sup>  
32: 1498.48 cm\*\*<sup>-1</sup>  
33: 1636.67 cm\*\*<sup>-1</sup>  
34: 1659.29 cm\*\*<sup>-1</sup>  
35: 3194.15 cm\*\*<sup>-1</sup>  
36: 3195.74 cm\*\*<sup>-1</sup>  
37: 3210.19 cm\*\*<sup>-1</sup>  
38: 3857.63 cm\*\*<sup>-1</sup>

### Min3(T<sub>i</sub>)

0: 0.00 cm\*\*<sup>-1</sup>  
1: 0.00 cm\*\*<sup>-1</sup>  
2: 0.00 cm\*\*<sup>-1</sup>  
3: 0.00 cm\*\*<sup>-1</sup>  
4: 0.00 cm\*\*<sup>-1</sup>  
5: 0.00 cm\*\*<sup>-1</sup>  
6: 12.38 cm\*\*<sup>-1</sup>  
7: 41.91 cm\*\*<sup>-1</sup>  
8: 71.93 cm\*\*<sup>-1</sup>  
9: 104.60 cm\*\*<sup>-1</sup>  
10: 188.25 cm\*\*<sup>-1</sup>  
11: 250.32 cm\*\*<sup>-1</sup>  
12: 297.53 cm\*\*<sup>-1</sup>  
13: 382.97 cm\*\*<sup>-1</sup>  
14: 431.87 cm\*\*<sup>-1</sup>  
15: 434.44 cm\*\*<sup>-1</sup>  
16: 548.60 cm\*\*<sup>-1</sup>  
17: 600.22 cm\*\*<sup>-1</sup>  
18: 638.29 cm\*\*<sup>-1</sup>  
19: 695.12 cm\*\*<sup>-1</sup>  
20: 825.17 cm\*\*<sup>-1</sup>  
21: 830.92 cm\*\*<sup>-1</sup>

22: 882.77 cm\*\*<sup>-1</sup>  
23: 971.19 cm\*\*<sup>-1</sup>  
24: 1003.40 cm\*\*<sup>-1</sup>  
25: 1103.40 cm\*\*<sup>-1</sup>  
26: 1163.15 cm\*\*<sup>-1</sup>  
27: 1185.84 cm\*\*<sup>-1</sup>  
28: 1235.95 cm\*\*<sup>-1</sup>  
29: 1307.43 cm\*\*<sup>-1</sup>  
30: 1334.58 cm\*\*<sup>-1</sup>  
31: 1439.55 cm\*\*<sup>-1</sup>  
32: 1515.23 cm\*\*<sup>-1</sup>  
33: 1626.01 cm\*\*<sup>-1</sup>  
34: 1668.18 cm\*\*<sup>-1</sup>  
35: 3206.05 cm\*\*<sup>-1</sup>  
36: 3221.12 cm\*\*<sup>-1</sup>  
37: 3222.52 cm\*\*<sup>-1</sup>  
38: 3856.04 cm\*\*<sup>-1</sup>

**P(S<sub>0</sub>)**

0: 0.00 cm\*\*<sup>-1</sup>  
1: 0.00 cm\*\*<sup>-1</sup>  
2: 0.00 cm\*\*<sup>-1</sup>  
3: 0.00 cm\*\*<sup>-1</sup>  
4: 0.00 cm\*\*<sup>-1</sup>  
5: 0.00 cm\*\*<sup>-1</sup>  
6: 0.00 cm\*\*<sup>-1</sup>  
7: 0.00 cm\*\*<sup>-1</sup>  
8: 15.96 cm\*\*<sup>-1</sup>  
9: 42.42 cm\*\*<sup>-1</sup>  
10: 53.11 cm\*\*<sup>-1</sup>  
11: 231.71 cm\*\*<sup>-1</sup>  
12: 261.98 cm\*\*<sup>-1</sup>  
13: 342.45 cm\*\*<sup>-1</sup>  
14: 393.37 cm\*\*<sup>-1</sup>  
15: 406.67 cm\*\*<sup>-1</sup>  
16: 429.24 cm\*\*<sup>-1</sup>  
17: 469.69 cm\*\*<sup>-1</sup>  
18: 591.93 cm\*\*<sup>-1</sup>  
19: 667.33 cm\*\*<sup>-1</sup>  
20: 700.60 cm\*\*<sup>-1</sup>  
21: 839.08 cm\*\*<sup>-1</sup>  
22: 889.06 cm\*\*<sup>-1</sup>  
23: 944.72 cm\*\*<sup>-1</sup>  
24: 962.03 cm\*\*<sup>-1</sup>  
25: 1071.77 cm\*\*<sup>-1</sup>  
26: 1147.59 cm\*\*<sup>-1</sup>  
27: 1192.53 cm\*\*<sup>-1</sup>  
28: 1248.05 cm\*\*<sup>-1</sup>  
29: 1289.72 cm\*\*<sup>-1</sup>  
30: 1350.15 cm\*\*<sup>-1</sup>  
31: 1450.10 cm\*\*<sup>-1</sup>  
32: 1500.85 cm\*\*<sup>-1</sup>  
33: 1571.10 cm\*\*<sup>-1</sup>  
34: 2067.42 cm\*\*<sup>-1</sup>  
35: 3198.00 cm\*\*<sup>-1</sup>

36: 3234.00 cm\*\*-1  
37: 3239.55 cm\*\*-1  
38: 3869.85 cm\*\*-1

**MECI-2(S<sub>1</sub>/S<sub>0</sub>)**

0: 0.00 cm\*\*-1  
1: 0.00 cm\*\*-1  
2: 0.00 cm\*\*-1  
3: 0.00 cm\*\*-1  
4: 0.00 cm\*\*-1  
5: 0.00 cm\*\*-1  
6: 0.00 cm\*\*-1  
7: 52.91 cm\*\*-1  
8: 58.89 cm\*\*-1  
9: 113.39 cm\*\*-1  
10: 162.47 cm\*\*-1  
11: 276.93 cm\*\*-1  
12: 323.85 cm\*\*-1  
13: 358.14 cm\*\*-1  
14: 424.98 cm\*\*-1  
15: 441.52 cm\*\*-1  
16: 469.55 cm\*\*-1  
17: 520.65 cm\*\*-1  
18: 547.56 cm\*\*-1  
19: 680.38 cm\*\*-1  
20: 778.40 cm\*\*-1  
21: 822.98 cm\*\*-1  
22: 875.75 cm\*\*-1  
23: 960.67 cm\*\*-1  
24: 975.45 cm\*\*-1  
25: 1049.80 cm\*\*-1  
26: 1154.62 cm\*\*-1  
27: 1183.22 cm\*\*-1  
28: 1242.42 cm\*\*-1  
29: 1282.53 cm\*\*-1  
30: 1355.19 cm\*\*-1  
31: 1426.64 cm\*\*-1  
32: 1520.94 cm\*\*-1  
33: 1617.85 cm\*\*-1  
34: 1754.34 cm\*\*-1  
35: 3191.29 cm\*\*-1  
36: 3205.97 cm\*\*-1  
37: 3225.25 cm\*\*-1  
38: 3864.08 cm\*\*-1

**Table S1.** Total energies calculated at the TD-DFT/def2-TZVP + CPCM(benzene) level for energy stationary points involved in the 1,2-dichoro-benzene photolysis.

|                             | <b><math>\omega</math>B97XD</b> | <b>CAM-B3LYP</b> | <b>PBE0</b> |
|-----------------------------|---------------------------------|------------------|-------------|
| <b>Min1</b> ( $S_0$ )       | -826.56693                      | -826.40845       | -826.28819  |
| <b>Min2</b> ( $S_1$ )       | -826.42706                      | -826.27878       | -826.16578  |
| <b>Min3</b> ( $T_1$ )       | -826.46504                      | -826.30473       | -826.17330  |
| <b>P</b> ( $S_0$ )          | -826.45215                      | -826.29987       | -826.17433  |
| <b>MECI-1</b> ( $S_2/S_1$ ) | -826.40494                      | -826.25879       | -826.14983  |

**Table S2.** Total energies calculated at the TD-DFT/def2-TZVP + CPCM(benzene) level for energy stationary points involved in the 1,2-di-bromo-benzene photolysis.

|                             | <b><math>\omega</math>B97XD</b> | <b>CAM-B3LYP</b> | <b>PBE0</b> |
|-----------------------------|---------------------------------|------------------|-------------|
| <b>Min1</b> ( $S_0$ )       | -5379.429                       | -5379.554        | -5378.567   |
| <b>Min2</b> ( $S_1$ )       | -5379.257                       | -5379.394        | -5378.415   |
| <b>Min3</b> ( $T_1$ )       | -5379.303                       | -5379.427        | -5378.429   |
| <b>P</b> ( $S_0$ )          | -5379.281                       | -5379.413        | -5378.420   |
| <b>MECI-1</b> ( $S_2/S_1$ ) | -5379.229                       | -5379.370        | -5378.391   |

**Table S3.** Total energies calculated at the TD-DFT/def2-TZVP + CPCM(benzene) level for energy stationary points involved in the 1,2-di-iodo-benzene photolysis.

|                             | <b><math>\omega</math>B97XD</b> | <b>CAM-B3LYP</b> | <b>PBE0</b> |
|-----------------------------|---------------------------------|------------------|-------------|
| <b>Min1</b> ( $S_0$ )       | -1151.48657                     | -1151.45133      | -1150.97990 |
| <b>Min2</b> ( $S_1$ )       | -1151.28534                     | -1151.26282      | -1150.79798 |
| <b>Min3</b> ( $T_1$ )       | -1151.33148                     | -1151.29875      | -1150.81611 |
| <b>P</b> ( $S_0$ )          | -1151.30775                     | -1151.27882      | -1150.80260 |
| <b>MECI-1</b> ( $S_2/S_1$ ) | -1151.25651                     | -1151.22823      | -1150.76827 |

**Table S4.** Total energies calculated at the WB97X/def2-TZVP + CPCM(benzene) level for energy stationary points involved in the 1,2,4 substituted di-iodo-benzenes photolysis.

|                                                 | CH <sub>3</sub> | CHO              | CN         |
|-------------------------------------------------|-----------------|------------------|------------|
| <b>Min1</b> (S <sub>0</sub> )                   | -865.88866      | -939.90980       | -918.81844 |
| <b>Min2</b> (S <sub>1</sub> )                   | -865.74840      | -939.77078       | -918.68062 |
| <b>Min3</b> (T <sub>1</sub> )                   | -865.79036      | -939.81111       | -918.71982 |
| <b>P</b> (S <sub>0</sub> )                      | -865.77234      | -939.79473       | -918.70461 |
| <b>MECI-1</b> (S <sub>2</sub> /S <sub>1</sub> ) | -865.73700      | -939.75161       | -918.67156 |
| <b>MECI-2</b> (S <sub>2</sub> /S <sub>1</sub> ) | -865.72629      | -939.74887       | -918.65855 |
|                                                 | NO <sub>2</sub> | OCH <sub>3</sub> | OH         |
| <b>Min1</b> (S <sub>0</sub> )                   | -1031.10876     | -941.11033       | -901.80907 |
| <b>Min2</b> (S <sub>1</sub> )                   | -1030.97093     | -940.96898       | -901.66954 |
| <b>Min3</b> (T <sub>1</sub> )                   | -1031.01007     | -941.01022       | -901.71125 |
| <b>P</b> (S <sub>0</sub> )                      | -1030.99349     | -940.95811       | -901.69107 |
| <b>MECI-1</b> (S <sub>2</sub> /S <sub>1</sub> ) | -1030.96197     | -940.95189       | -901.65671 |
| <b>MECI-2</b> (S <sub>2</sub> /S <sub>1</sub> ) | -1030.94760     | -940.94364       | -901.64656 |

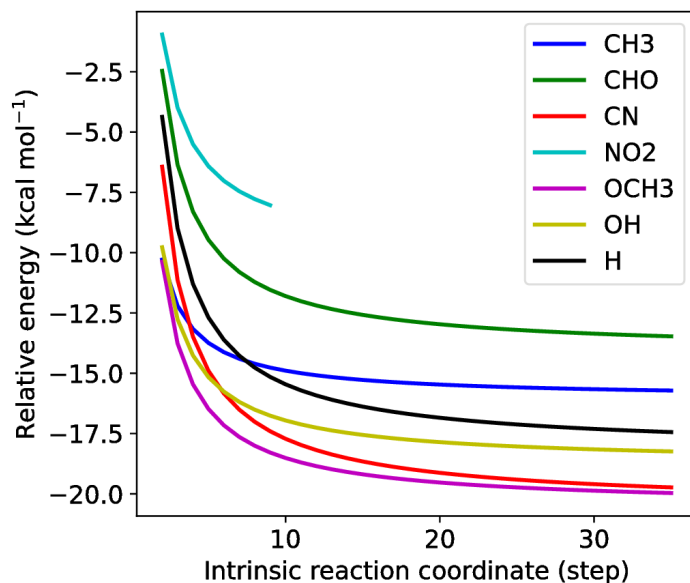

**Figure S1.** IRC of substituted 1,2,4-di-iodo benzenes along the FC  $\rightarrow$  MECI-1 ( $S_2/S_1$ ) deactivation process.

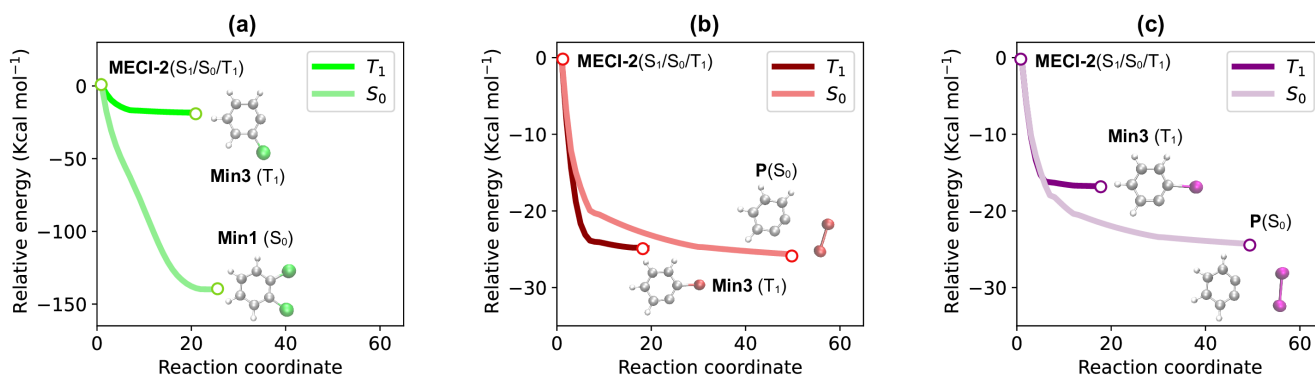

**Figure S2.** IRC of benzyne and phenyl radicals productions from MECI-2. Benzyne forms at  $S_0$  for heaviest functionalized species, while the radical upon deactivation from  $T_1$ .



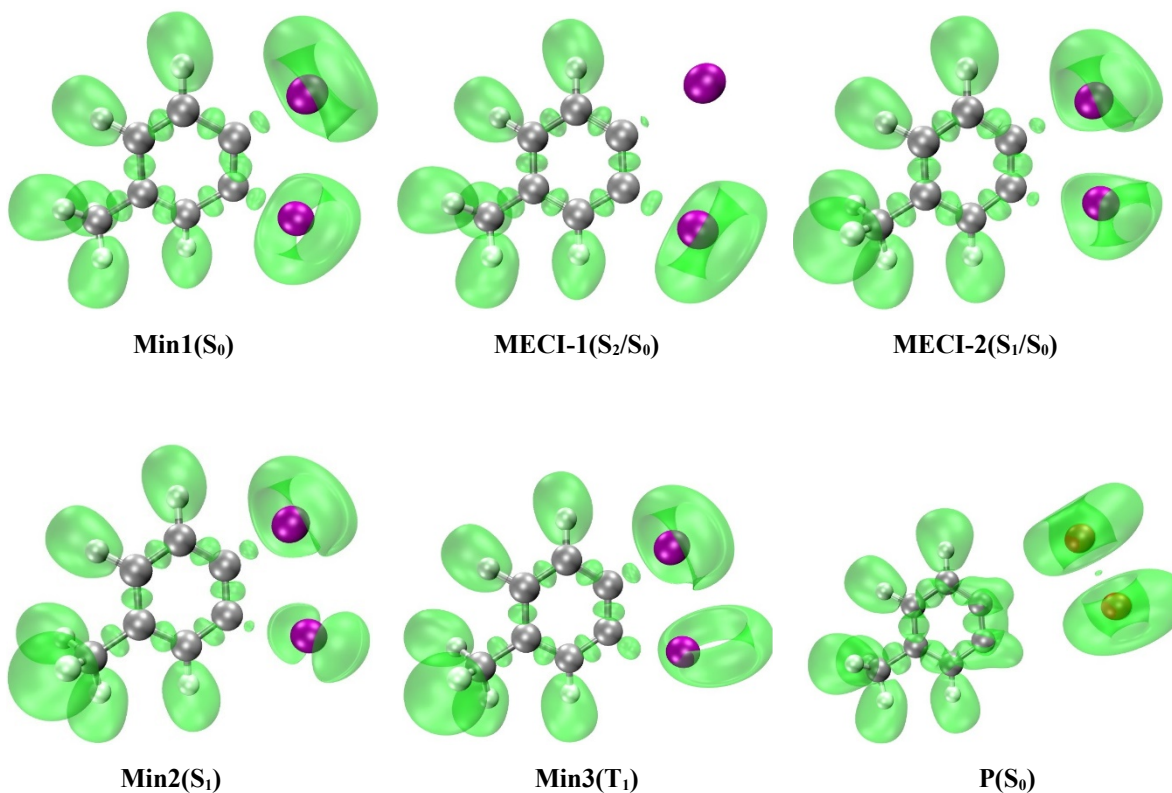

**Figure S3.** Relevant stationary energy points along the pathway of the 1,2-di-iodo-4-methyl benzene photolysis.

**Table S5.** Electronic populations,  $e$ , of monosynaptic and disynaptic basins at stationary points featuring the 1,2-di-iodo-4-methyl benzene photolysis.

| Basin    | Min1 | MECI-1 | MECI-2 | Min2 | Min3 | P    |
|----------|------|--------|--------|------|------|------|
| V(C1,C2) | 3.41 | 2.95   | 3.19   | 2.98 | 2.84 | 3.15 |
| V(C1,I1) | 1.70 | 1.17   | -      | 1.58 | 1.65 | -    |
| V(C2,I2) | 1.70 | 1.69   | -      | -    | -    | -    |
| V(I1,I2) | -    | -      | -      | -    | -    | 0.82 |
| V(C1)    | -    | -      | 1.26   | -    | -    | 1.14 |
| V(C2)    | -    | -      | 0.89   | 1.01 | 1.16 | -    |
| V(I1)    | -    | -      | -      | -    | -    | -    |
| V(I2)    | -    | -      | -      | -    | -    | -    |

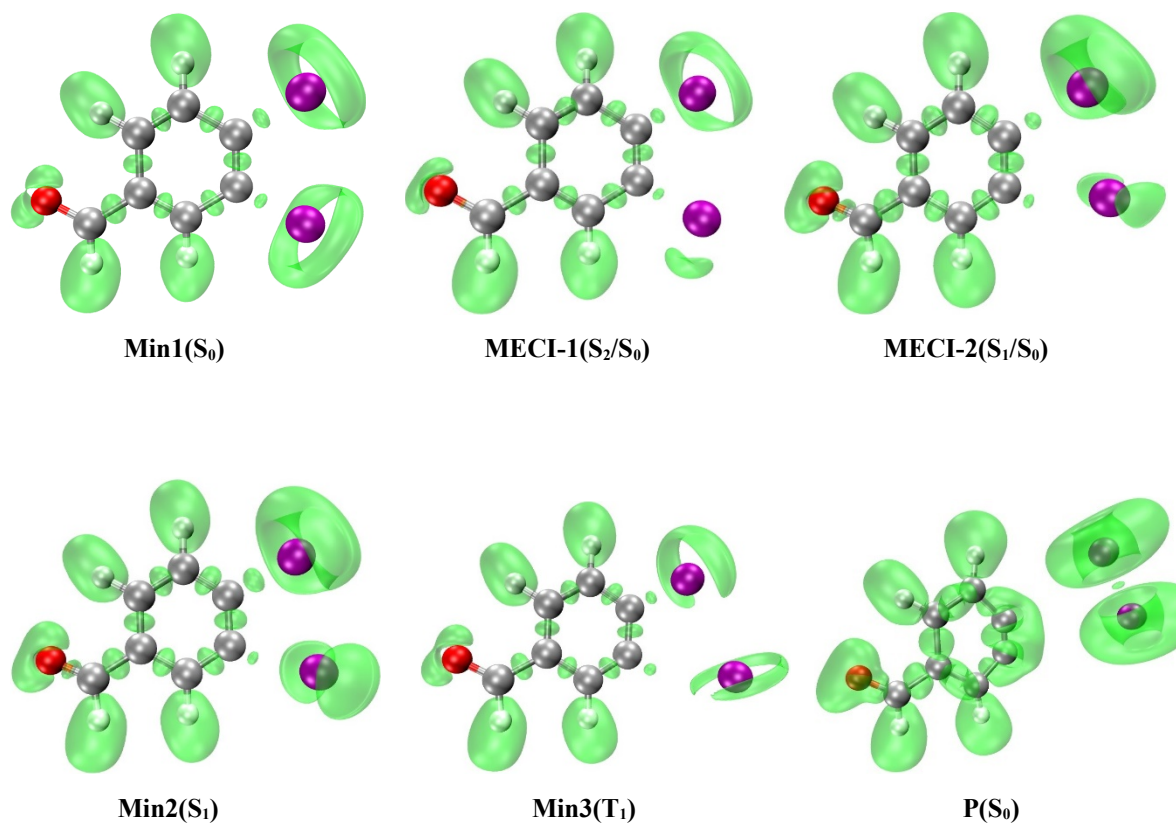

**Figure S4.** Relevant stationary energy points along the pathway of the 1,2-di-iodo-4-formylbenzene photolysis.

**Table S6.** Electronic populations,  $e$ , of monosynaptic and disynaptic basins at stationary points featuring the 1,2-di-iodo-4-formylbenzene photolysis.

| Basin    | Min1 | MECI-1 | MECI-2 | Min2 | Min3 | P    |
|----------|------|--------|--------|------|------|------|
| V(C1,C2) | 3.40 | 3.17   | 2.24   | 2.96 | 2.84 | 4.48 |
| V(C1,I1) | 2.64 | 2.24   | 1.39   | 1.69 | 1.67 | -    |
| V(C2,I2) | 1.72 | 1.73   | -      | -    | -    | -    |
| V(I1,I2) | -    | -      | -      | -    | -    | 1.00 |
| V(C1)    | -    | -      | -      | -    | -    | -    |
| V(C2)    | -    | -      | 1.00   | 1.05 | 1.18 | 0.42 |
| V(I1)    | -    | -      | -      | -    | -    | -    |
| V(I2)    | -    | -      | -      | -    | -    | -    |

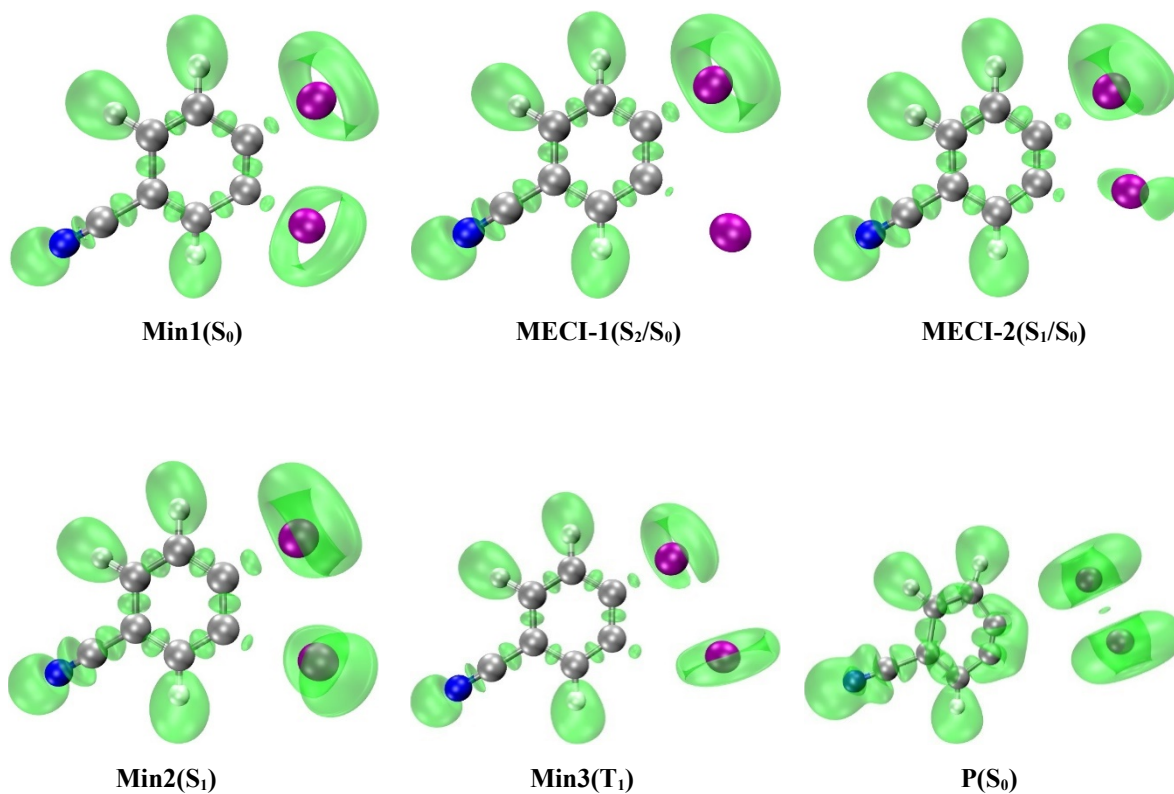

**Figure S5.** Relevant stationary energy points along the pathway of the 1,2-di-iodo-4-cyanobenzene photolysis.

**Table S7.** Electronic populations,  $e$ , of monosynaptic and disynaptic basins at stationary points featuring the 1,2-di-iodo-4-cyanobenzene photolysis.

| Basin    | Min1 | MECI-1 | MECI-2 | Min2 | Min3 | P    |
|----------|------|--------|--------|------|------|------|
| V(C1,C2) | 3.33 | 2.82   | 3.08   | 2.92 | 2.83 | 4.46 |
| V(C1,I1) | 1.72 | 1.67   | 1.40   | 1.70 | 1.68 | -    |
| V(C2,I2) | 2.07 | -      | -      | -    | -    | -    |
| V(I1,I2) | -    | -      | -      | -    | -    | 1.00 |
| V(C1)    | -    | -      | -      | -    | -    | 0.39 |
| V(C2)    | -    | 1.15   | 1.01   | 1.06 | 1.14 | 0.46 |
| V(I1)    | -    | -      | -      | -    | -    | -    |
| V(I2)    | -    | -      | -      | -    | -    | -    |

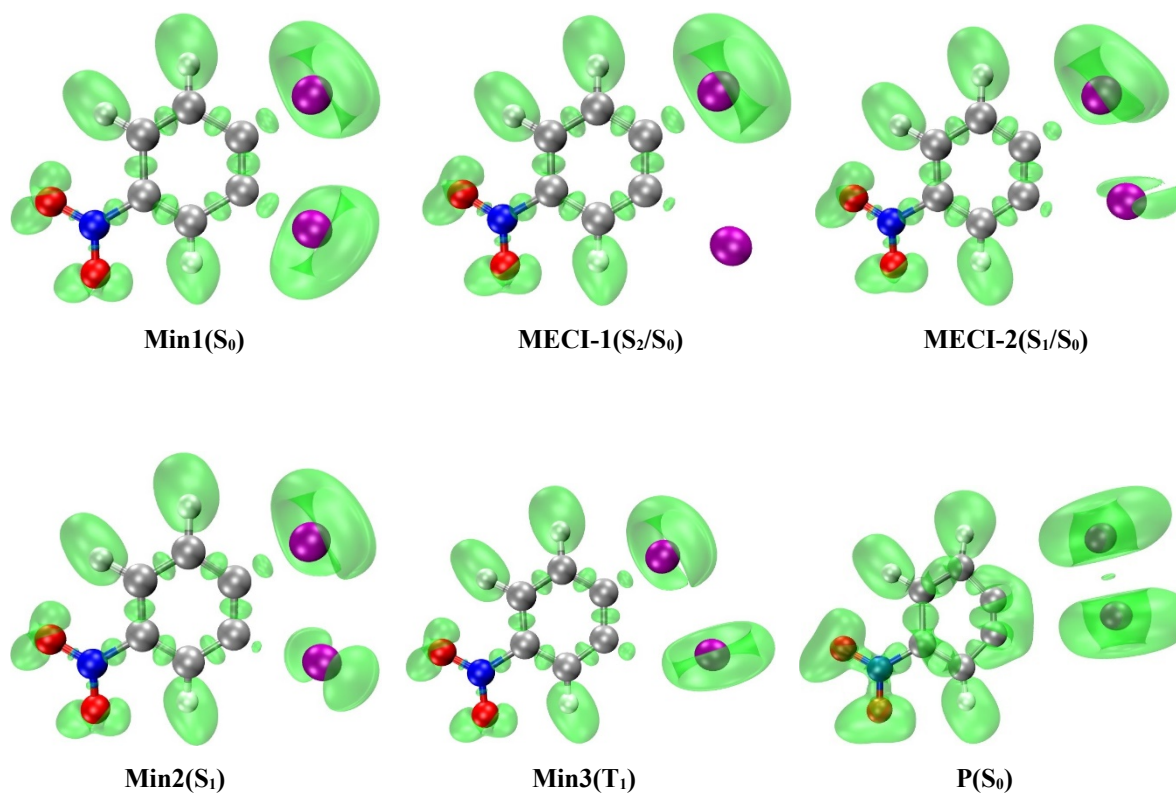

**Figure S6.** Relevant stationary energy points along the pathway of the 1,2-di-iodo-4-nitrobenzene photolysis.

**Table S8.** Electronic populations,  $e$ , of monosynaptic and disynaptic basins at stationary points featuring the 1,2-di-iodo-4-nitrobenzene photolysis.

| Basin    | Min1 | MECI-1 | MECI-2 | Min2 | Min3 | P    |
|----------|------|--------|--------|------|------|------|
| V(C1,C2) | 3.33 | 2.83   | 3.09   | 2.91 | 2.81 | 4.46 |
| V(C1,I1) | 1.92 | 1.75   | 1.46   | 1.70 | 1.69 | -    |
| V(C2,I2) | 1.81 | -      | -      | -    | -    | -    |
| V(I1,I2) | -    | -      | -      | -    | -    | 1.00 |
| V(C1)    | -    | -      | -      | -    | -    | 0.39 |
| V(C2)    | -    | 1.16   | 1.02   | 1.11 | 1.14 | 0.48 |
| V(I1)    | -    | -      | -      | 2.11 | -    | -    |
| V(I2)    | -    | -      | -      | -    | -    | -    |

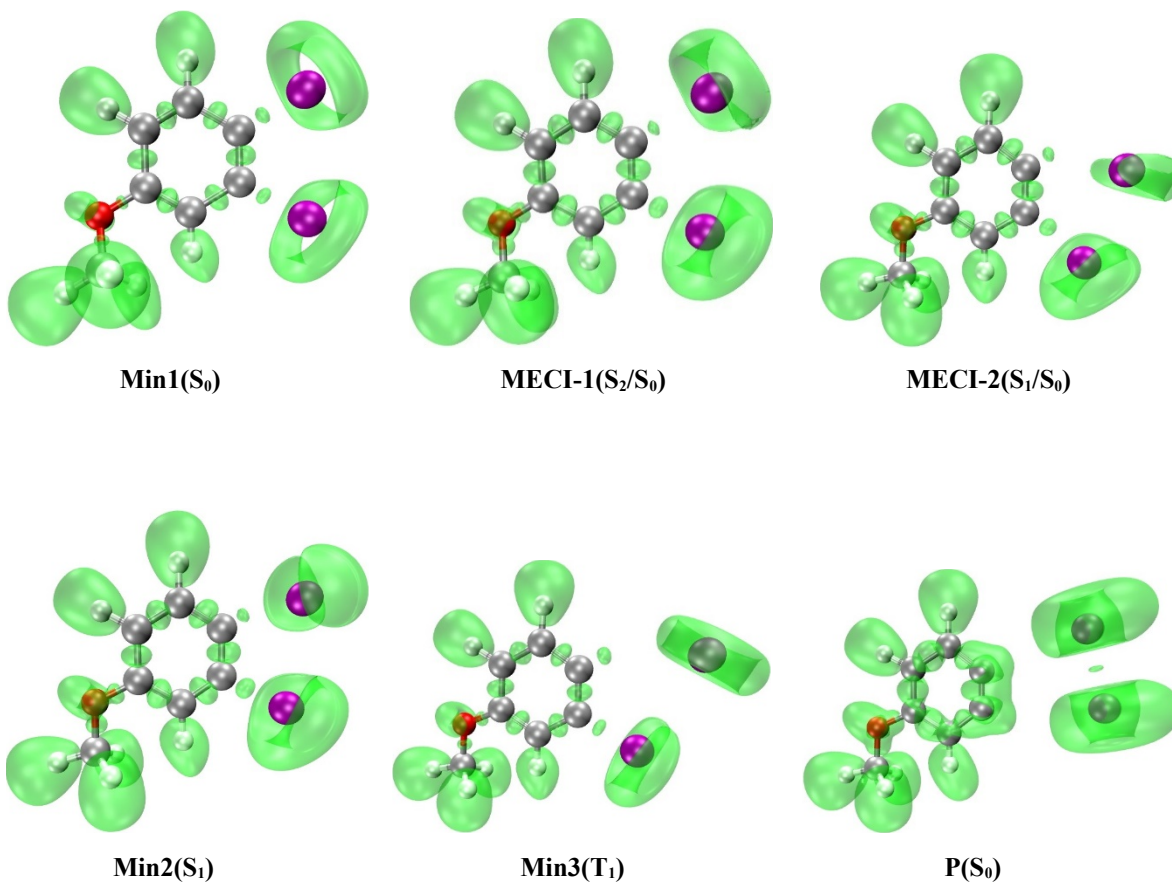

**Figure S7.** Relevant stationary energy points along the pathway of the 1,2-di-iodo-4-methoxybenzene photolysis.

**Table S9.** Electronic populations,  $e$ , of monosynaptic and disynaptic basins at stationary points featuring the 1,2-di-iodo-4-methoxybenzene photolysis.

| Basin    | Min1 | MECI-1 | MECI-2 | Min2 | Min3 | P    |
|----------|------|--------|--------|------|------|------|
| V(C1,C2) | 3.42 | 2.95   | 2.68   | 3.04 | 2.93 | 3.53 |
| V(C1,I1) | 2.47 | 1.33   | -      | -    | -    | -    |
| V(C2,I2) | 1.71 | 1.51   | 1.45   | 1.57 | 1.64 | -    |
| V(I1,I2) | -    | -      | -      | -    | -    | 1.02 |
| V(C1)    | -    | -      | 0.98   | 1.59 | 1.20 | 0.75 |
| V(C2)    | -    | -      | -      | -    | -    | 0.83 |
| V(I1)    | -    | -      | -      | -    | -    | -    |
| V(I2)    | -    | -      | -      | -    | -    | -    |



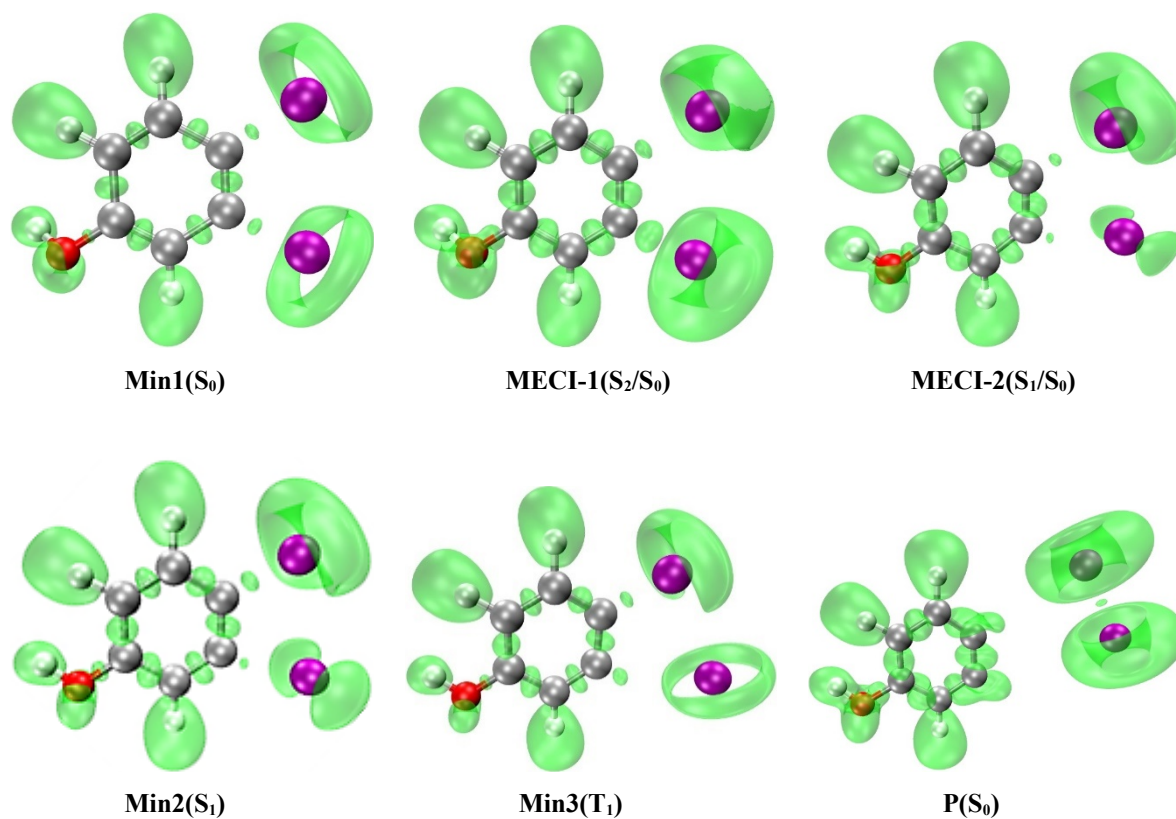

**Figure S8.** Relevant stationary energy points along the pathway of the 1,2-di-iodo-4-hydroxybenzene photolysis.

**Table S10.** Electronic populations,  $e$ , of monosynaptic and disynaptic basins at stationary points featuring the 1,2-di-iodo-4-hydroxybenzene photolysis.

| Basin    | Min1 | MECI-1 | MECI-2 | Min2 | Min3 | P    |
|----------|------|--------|--------|------|------|------|
| V(C1,C2) | 3.43 | 2.87   | 3.15   | 2.92 | 2.83 | 3.18 |
| V(C1,I1) | 1.70 | 1.21   | 1.29   | 1.59 | 1.66 | -    |
| V(C2,I2) | 1.71 | 1.69   | -      | -    | -    | -    |
| V(I1,I2) | -    | -      | -      | -    | -    | 1.06 |
| V(C1)    | -    | -      | -      | -    | -    | 0.77 |
| V(C2)    | -    | -      | 0.92   | 1.04 | 1.14 | 1.06 |
| V(I1)    | -    | -      | -      | -    | -    | -    |
| V(I2)    | -    | -      | -      | -    | -    | -    |

## References

- 55 X. Krokidis, S. Noury and B. Silvi, *J Phys Chem A*, 1997, **101**, 7277–7282.
- 56 A. D. Becke and K. E. Edgecombe, *J Chem Phys*, 1990, **92**, 5397–5403.
- 57 R. F. W. Bader, *Atoms in molecules. A Quantum theory*, Clarendon Press Oxford, 1ed edn., 1994.
- 58 C. Robinson, *Dynamical Systems*, CRC Press, 2nd edn., 1999.
- 59 R. Gilmore, in *Encyclopedia of Applied Physics*, VCH Publisher, 1st edn., 1992, vol. 3.
- 60 R. J. Gillespie and R. S. Nyholm, *Q Rev Chem Soc*, 1957, **11**, 339–380.
- 61 B. Silvi, *J Mol Struct*, 2002, **614**, 3–10.
- 62 A. Savin, B. Silvi and F. Colonna, *Can J Chem*, 1996, **74**, 1088–1096.
- 63 L. Ayarde-Henríquez, C. Guerra, M. Duque-Noreña, E. Rincón, P. Pérez and E. Chamorro, *Chem Phys Chem*, 2022, **23**, e202200343.
- 64 E. Chamorro, C. Guerra, L. Ayarde-Henríquez, M. Noreña-Duque P. Pérez and E. Rincón, in *Chemical Reactivity: Theories and Principles*, eds. S. Kayas, L. von Szentpály, G. Serdaroglu and L. Guo, Elsevier, 2023, vol. 1, pp. 465–481.
- 65 L. Ayarde-Henríquez, C. Guerra, M. Duque-Noreña and E. Chamorro, *Phys Chem Chem Phys*, 2023, **25**, 14274–14284.
- 66 L. Ayarde-Henríquez, C. Guerra, M. Duque-Noreña and E. Chamorro, *New J Chem*, 2022, **46**, 12002–12009.
- 67 C. Guerra, L. Ayarde-Henríquez, M. Duque-Noreña and E. Chamorro, *Chem Phys Chem*, 2022, **23**, 202200217.
- 68 C. Guerra, L. Ayarde-Henríquez, Y. A. Rodríguez-Núñez, A. Ensuncho and E. Chamorro, *Chem Phys Chem*, 2023, **24**, e202200867.
- 69 J. K. Burdett and T. A. McCormick, *J Phys Chem A*, 1998, **102**, 6366–6372.
- 70 M. Kohout and A. Savin, *J Comput Chem*, 1997, **18**, 1431–1439.
- 71 V. Tsirelson and A. Stash, *Chem Phys Lett*, 2002, **351**, 142–148.
- 72 D. J. Grimwood, I. A. N. Bytheway and D. Jayatilaka, *J Comput Chem*, 2003, **24**, 470–483.
